# Supplementary material for: Electrochemical promoted three-component reaction to unsymmetric thiosulfonates
Source: Royal Society of Chemistry journal article supplement (doi:10.1039/d4cc03570d), 2024-01-01

# Supplementary Information

## **Electrochemical promoted three-component reaction to unsymmetric thiosulfonates**

Hong-Min Lin, Sai-Yan Ren, Fei-Hu Cui,\* Ying-Ming Pan and Hai-Tao Tang\*

State Key Laboratory for Chemistry and Molecular Engineering of Medicinal Resources, Key Laboratory for Chemistry and Molecular Engineering of Medicinal Resources (Ministry of Education of China), Collaborative Innovation Center for Guangxi Ethnic Medicine, School of Chemistry and Pharmaceutical Sciences, Guangxi Normal University, Guilin 541004, People's Republic of China.

E-mail: [cuifeihuhao@163.com](mailto:cuifeihuhao@163.com), [httang@gxnu.edu.cn](mailto:httang@gxnu.edu.cn)

## Table of Contents

|                                                                                              |           |
|----------------------------------------------------------------------------------------------|-----------|
| <b>1. General methods.....</b>                                                               | <b>3</b>  |
| <b>2. Chemical experiment procedure.....</b>                                                 | <b>4</b>  |
| <b>2.1 Synthesis of products .....</b>                                                       | <b>4</b>  |
| <b>2.2 Synthesis of Phenyl isothiocyanate derivatives.....</b>                               | <b>4</b>  |
| <b>2.3 Optimization of the reaction conditions .....</b>                                     | <b>5</b>  |
| <b>2.4 Cyclic Voltammetry Experiments .....</b>                                              | <b>6</b>  |
| <b>3. the HRMS spectra of Molecules.....</b>                                                 | <b>7</b>  |
| <b>4. <sup>1</sup>H, <sup>13</sup>C NMR, <sup>19</sup>F and MS data of all products.....</b> | <b>9</b>  |
| <b>4.Copies of <sup>13</sup>C and <sup>1</sup>H NMR spectra for all product.....</b>         | <b>17</b> |

## 1. General methods

Unless otherwise noted, all reagents and solvents were obtained commercially and used without further purification. Column chromatography on silica gel (300-400 mesh) was carried out using technical grade 60-90 °C petroleum ether and analytical grade EtOAc (without further purification).  $^1\text{H}$  and  $^{13}\text{C}$  spectra were recorded with Bruker Avance III HD (400 MHz) or Bruker Avance NEO (600 MHz) spectrometer with tetramethylsilane as an internal standard. Chemical shifts were reported in ppm.  $^1\text{H}$  NMR spectra were referenced to  $\text{CDCl}_3$  (7.26 ppm) or DMSO (2.5 ppm), and  $^{13}\text{C}$ -NMR spectra were referenced to  $\text{CDCl}_3$  (77.0 ppm) or DMSO (39.5 ppm). Peak multiplicities were designated by the following abbreviations: s, singlet; d, doublet; t, triplet; m, multiplet; brs, broad singlet and J, coupling constant in Hz. LC-MS spectra were recorded on Agilent 6545 Q-TOF LC/MS using electron spray ionization (ESI) source. Cyclic voltammograms were recorded on a CHI 660E potentiostat.

## 2. Chemical experiment procedure

### 2.1 Synthesis of products

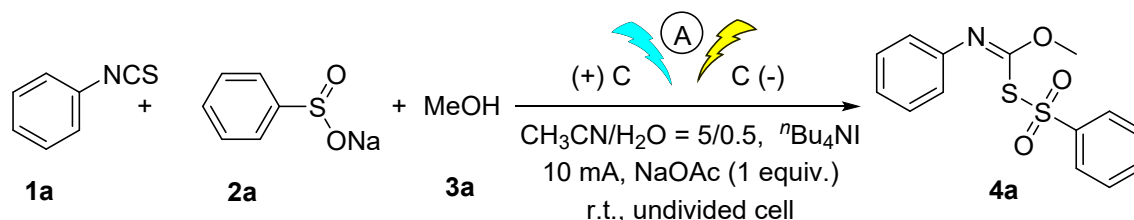

Add phenyl isothiocyanate **1a** (0.3 mmol, 1.0 equiv.), sodium benzenesulfinate **2a** (0.6 mmol, 2.0 equiv.), methanol **3a** (0.6 mmol, 2.0 equiv.), and  $n\text{Bu}_4\text{NI}$  (0.3 mmol, 1.0 equiv.) into a 10 ml three-neck round-bottomed flask. The flask is equipped with a graphite rod ( $\Phi$  8 mm) anode and a graphite rod ( $\Phi$  8 mm) cathode. Add  $\text{CH}_3\text{CN}$  (5 mL) and  $\text{H}_2\text{O}$  (0.5 mL) as solvents, and add sodium acetate (0.3 mmol, 1.0 equiv.). Pass a current of 10 mA at room temperature for approximately 6 hours until the substrate is completely consumed (monitored by TLC). Concentrate under reduced pressure and purify by silica gel column chromatography to obtain the product **4a**.

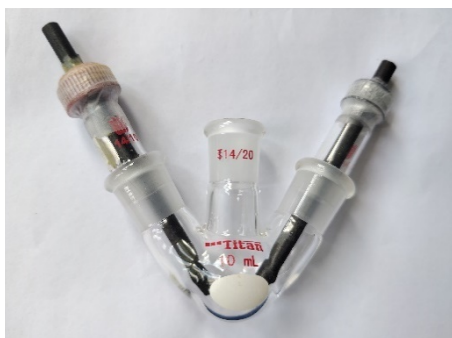

Figure S1. Undivided cell for current controlled electrolysis

### 2.2 Synthesis of Phenyl isothiocyanate derivatives

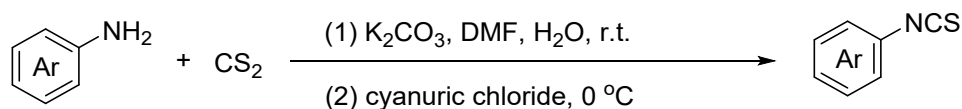

Add aniline (5 mmol, 1equiv.), DMF (10 mL),  $\text{H}_2\text{O}$  (15 mL), and potassium carbonate

(5.5 mmol) into a dried 100 mL round-bottom flask and stir for 10 minutes at room temperature. Then, add CS<sub>2</sub> (1.5 mL) and stir at room temperature for 24 hours. After cooling the mixture to 0 °C, add cyanuric chloride (5 mmol) and stir the mixture at 0 °C for 2 hours. Adjust the pH of the mixture to 10 by adding an aqueous solution of sodium hydroxide (10% in H<sub>2</sub>O) and stir at 0 °C for 30 minutes. Add DCM (30 mL), wash the resulting solution with H<sub>2</sub>O (50 mL), and extract with DCM (20 mL×3). Dry the organic layer with Na<sub>2</sub>SO<sub>4</sub>, concentrate under reduced pressure, and purify by column chromatography.

## 2.3 Optimization of the reaction conditions

**Table S2** Optimization study for electrochemical synthesis of unsymmetric thiosulfonates <sup>a</sup>

| Entry | Variation from standard conditions                                                        | Yield <sup>b</sup> |
|-------|-------------------------------------------------------------------------------------------|--------------------|
| 1     | None                                                                                      | 82%                |
| 2     | CH <sub>2</sub> Cl <sub>2</sub> /H <sub>2</sub> O (5/1)                                   | Trace              |
| 3     | DMSO/H <sub>2</sub> O (5/1)                                                               | 32%                |
| 4     | DMF/H <sub>2</sub> O (5/1)                                                                | 27%                |
| 5     | Acetone/H <sub>2</sub> O (5/1)                                                            | Trace              |
| 6     | CH <sub>3</sub> CN/H <sub>2</sub> O (5/1)                                                 | 78%                |
| 7     | CH <sub>3</sub> CN/H <sub>2</sub> O (5/0.2)                                               | 74%                |
| 8     | <sup>n</sup> Bu <sub>4</sub> NBF <sub>4</sub> instead of <sup>n</sup> Bu <sub>4</sub> NI  | N.R.               |
| 9     | <sup>n</sup> Bu <sub>4</sub> NClO <sub>4</sub> instead of <sup>n</sup> Bu <sub>4</sub> NI | N.R.               |
| 10    | <sup>n</sup> Bu <sub>4</sub> NOAc instead of <sup>n</sup> Bu <sub>4</sub> NI              | N.R.               |
| 11    | <sup>n</sup> Bu <sub>4</sub> NBr instead of <sup>n</sup> Bu <sub>4</sub> NI               | Trace              |
| 12    | Et <sub>4</sub> NI instead of <sup>n</sup> Bu <sub>4</sub> NI                             | 35%                |
| 13    | NH <sub>4</sub> I instead of <sup>n</sup> Bu <sub>4</sub> NI                              | 40%                |
| 14    | NaI instead of <sup>n</sup> Bu <sub>4</sub> NI                                            | 10%                |
| 15    | C(+) – Pt(-)                                                                              | 40%                |
| 16    | C(+) – SS(-)                                                                              | 15%                |
| 17    | C(+) – Ni(-)                                                                              | Trace              |
| 18    | C(+) – Zn(-)                                                                              | Trace              |
| 19    | Na <sub>2</sub> CO <sub>3</sub> as additive                                               | 43%                |
| 20    | Cs <sub>2</sub> CO <sub>3</sub> as additive                                               | 27%                |
| 21    | NaOH as additive                                                                          | 25%                |
| 22    | DBU as additive                                                                           | Trace              |
| 23    | NaOMe as additive                                                                         | 40%                |
| 24    | <sup>t</sup> BuONa as additive                                                            | Trace              |

|    |                                       |      |
|----|---------------------------------------|------|
| 25 | LiOAc as additive                     | 44%  |
| 26 | KOAc as additive                      | 21%  |
| 27 | 0.5 equiv. NaOAc instead of 1equiv.   | 65%  |
| 28 | 2 equiv. NaOAc instead of 1equiv.     | 55%  |
| 29 | 5 mA instead of 10 mA                 | 67%  |
| 30 | 15 mA instead of 10 mA                | 72%  |
| 31 | Constant potential: 1.5 V vs. Ag/AgCl | 73%  |
| 32 | 50 °C instead of room temperature     | 76%  |
| 33 | Reaction under N <sub>2</sub>         | 75%  |
| 34 | No electricity                        | N.R. |

## 2.4 Cyclic Voltammetry Experiments

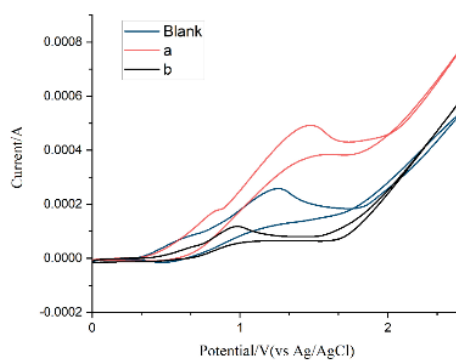

**Scheme S1.** cyclic voltammetry experiments. Cyclic voltammograms in an electrolyte solution of <sup>n</sup>Bu<sub>4</sub>NI (0.1 M) in CH<sub>3</sub>CN/H<sub>2</sub>O (v/v = 5/0.5) using a glassy carbon disk working electrode (diameter, 3.0 mm), Pt disk and Ag/AgCl as counter and reference electrode at 100 mV/s scan rate: (Blank) <sup>n</sup>Bu<sub>4</sub>NI (0.1 M) in CH<sub>3</sub>CN/H<sub>2</sub>O (v/v = 5/0.5); (a) zzThiocarbamate (0.3 mmol); (b) Sodium benzenesulfite (0.3 mmol).

### 3. the HRMS spectra of Molecules

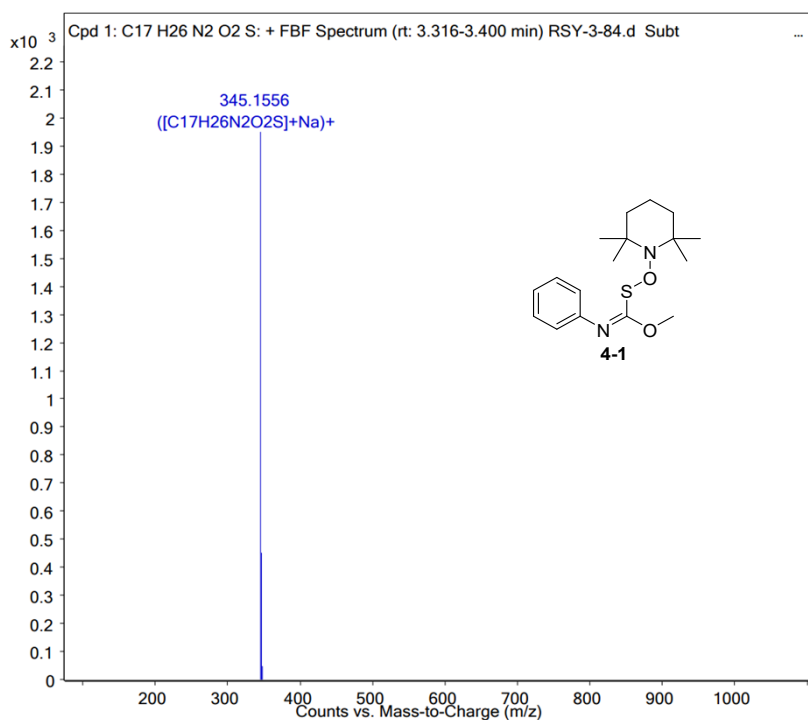

Figure S2. the HRMS spectra of the TEMPO-trapped product (4-1)

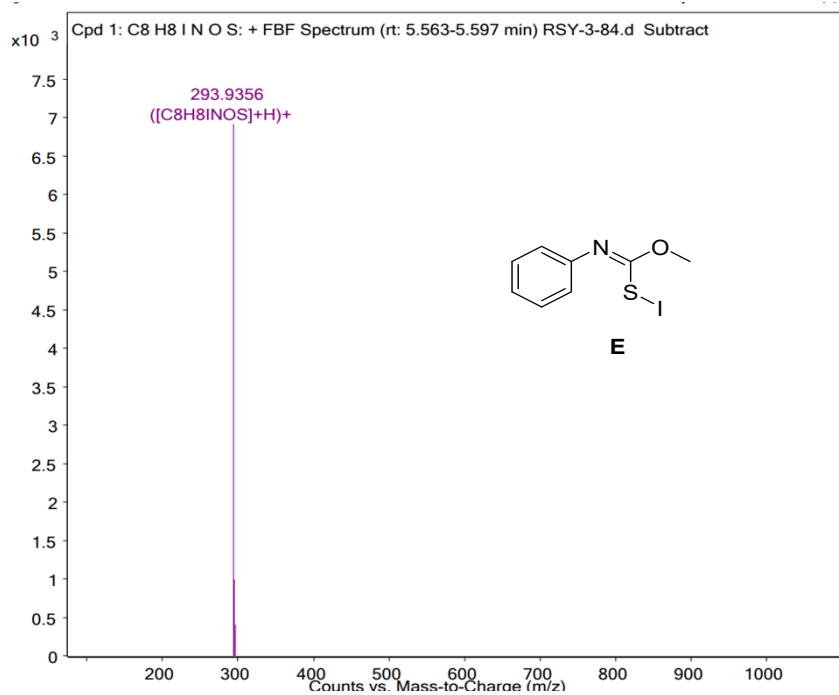

Figure S3. the HRMS spectra of the controls E

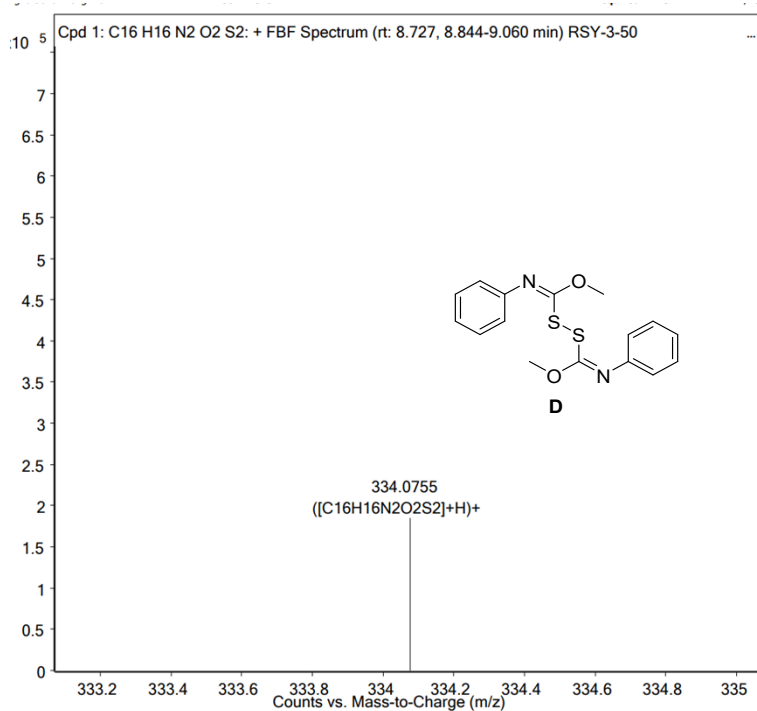

**Figure S4.** the HRMS spectra of the controls D

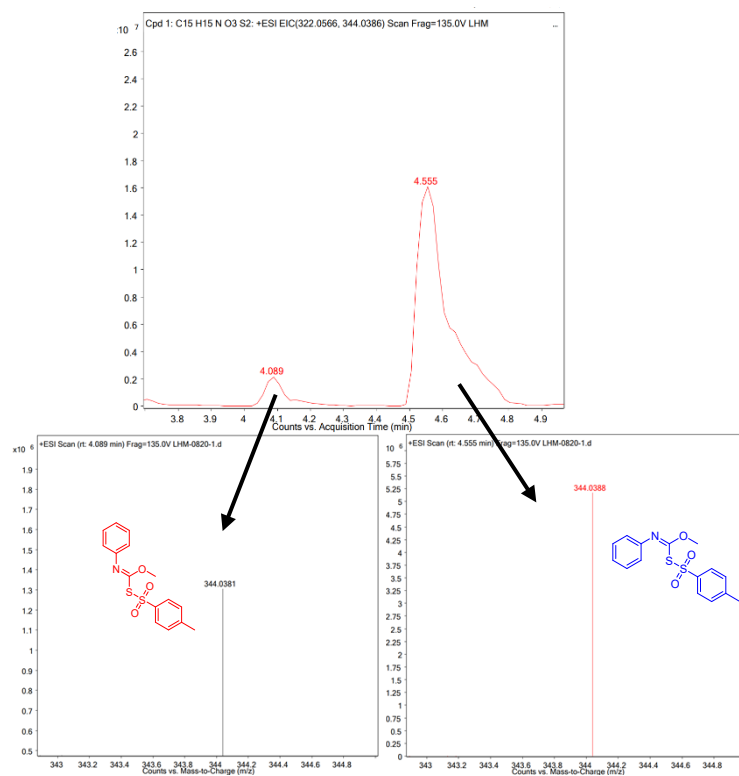

**Figure S5.** the HRMS spectra of 4b



#### 4. $^1\text{H}$ , $^{13}\text{C}$ NMR, $^{19}\text{F}$ and MS data of all products

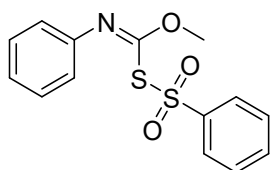

(*Z*)-Benzenesulfonic (methyl (*E*)-phenylcarbonimidic) thioanhydride (**4a**). White solid; Yield = 80%, 73.7 mg (PE/EA = 10:1);  $^1\text{H}$  NMR (400 MHz, Chloroform-*d*)  $\delta$  7.99 – 7.95 (m, 2H), 7.70 – 7.66 (m, 1H), 7.60 – 7.56 (m, 2H), 7.30 – 7.26 (m, 2H), 7.15 – 7.10 (m, 1H), 6.77 – 6.74 (m, 2H), 3.93 (s, 3H);  $^{13}\text{C}$  NMR (100 MHz, Chloroform-*d*)  $\delta$  150.7, 145.5, 144.9, 134.3, 129.3, 129.2, 127.9, 125.1, 121.4, 57.3; HRMS (ESI-TOF)  $m/z$ :  $[\text{M} + \text{H}]^+$  Calcd. for  $[\text{C}_{14}\text{H}_{14}\text{NO}_3\text{S}_2]^+$  308.0410, found 308.0411.

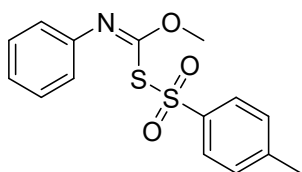

(*Z*)-(Methyl (*E*)-phenylcarbonimidic) 4-methylbenzenesulfonic thioanhydride (**4b**). White solid; Yield = 82%, 78.9 mg (PE/EA = 10:1);  $^1\text{H}$  NMR (400 MHz, Chloroform-*d*)  $\delta$  7.86 – 7.84 (m, 2H), 7.37 – 7.35 (m, 2H), 7.30 – 7.27 (m, 2H), 7.13 – 7.09 (m, 1H), 6.76 – 6.74 (m, 2H), 3.94 (s, 3H), 2.48 (s, 3H);  $^{13}\text{C}$  NMR (100 MHz, Chloroform-*d*)  $\delta$  150.9, 145.6, 144.9, 142.6, 129.7, 129.2, 129.1, 128.0, 125.0, 121.4, 57.22, 21.89; HRMS (ESI-TOF)  $m/z$ :  $[\text{M} + \text{H}]^+$  Calcd. for  $[\text{C}_{15}\text{H}_{16}\text{NO}_3\text{S}_2]^+$  322.0566, found 322.0565.

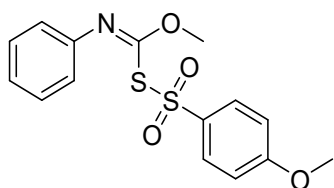

(*Z*)-4-Methoxybenzenesulfonic (methyl (*E*)-phenylcarbonimidic) thioanhydride (**4c**). White solid; Yield = 80%, 80.9 mg (PE/EA = 10:1);  $^1\text{H}$  NMR (400 MHz, Chloroform-*d*)  $\delta$  7.92 – 7.88 (m, 2H), 7.30 – 7.26 (m, 2H), 7.14 – 7.09 (m, 1H), 7.03 – 6.99 (m, 2H), 6.77 – 6.75 (m, 2H), 3.96 (s, 3H), 3.91 (s, 3H);  $^{13}\text{C}$  NMR (100 MHz, Chloroform-*d*)  $\delta$  164.2, 151.1, 145.0, 137.1, 130.4, 129.3, 125.0, 121.4, 114.2, 57.2, 56.0; HRMS (ESI-TOF)  $m/z$ :  $[\text{M} + \text{H}]^+$  Calcd. for  $[\text{C}_{15}\text{H}_{16}\text{NO}_4\text{S}_2]^+$  338.0515, found 338.0510.

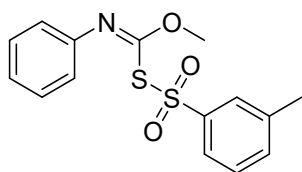

(Z)-(Methyl (*E*)-phenylcarbonimidic) 3-methylbenzenesulfonic thioanhydride (**4d**). White solid; Yield = 76%, 73.2 mg (PE/EA = 10:1); **<sup>1</sup>H NMR** (400 MHz, Chloroform-*d*)  $\delta$  7.86 – 7.84 (m, 2H), 7.37 – 7.35 (m, 2H), 7.31 – 7.28 (m, 2H), 7.12 – 7.05 (m, 1H), 6.76 – 6.74 (m, 2H), 3.94 (s, 3H), 2.48 (s, 3H); **<sup>13</sup>C NMR** (100 MHz, Chloroform-*d*)  $\delta$  151.0, 145.6, 145.0, 142.7, 129.7, 129.3, 129.2, 128.0, 125.0, 121.4, 57.2, 21.9; **HRMS** (ESI-TOF) *m/z*: [M + H]<sup>+</sup> Calcd. for [C<sub>15</sub>H<sub>16</sub>NO<sub>3</sub>S<sub>2</sub>]<sup>+</sup> 322.0566, found 322.0559.

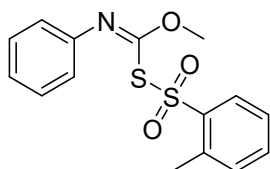

(Z)-(Methyl (*E*)-phenylcarbonimidic) 2-methylbenzenesulfonic thioanhydride (**4e**). White solid; Yield = 75%, 72.2 mg (PE/EA = 10:1); **<sup>1</sup>H NMR** (400 MHz, Chloroform-*d*)  $\delta$  7.98 (m, 2H), 7.67 (m, 1H), 7.58 (m, 2H), 7.16 (m, 1H), 7.10 (m, 1H), 7.04 (m, 1H), 6.60 (m, 1H), 3.96 (s, 3H), 2.07 (s, 3H). **<sup>13</sup>C NMR** (100 MHz, Chloroform-*d*)  $\delta$  150.3, 145.5, 143.5, 134.3, 130.8, 129.5, 129.2, 127.9, 126.6, 125.2, 120.9, 57.2, 17.7; **HRMS** (ESI-TOF) *m/z*: [M + H]<sup>+</sup> Calcd. for [C<sub>15</sub>H<sub>16</sub>NO<sub>3</sub>S<sub>2</sub>]<sup>+</sup> 322.0566, found 322.0563.

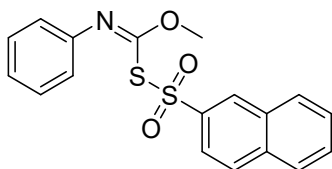

(Z)-(Methyl (*E*)-phenylcarbonimidic) naphthalene-2-sulfonic thioanhydride (**4f**). White solid; Yield = 71%, 76.1 mg (PE/EA = 10:1); **<sup>1</sup>H NMR** (400 MHz, Chloroform-*d*)  $\delta$  8.49 – 8.48 (m, 1H), 7.96 – 7.93 (m, 2H), 7.90 – 7.86 (m, 2H), 7.67 – 7.57 (m, 2H), 7.23 – 7.19 (m, 2H), 7.07 – 7.03 (m, 1H), 6.70 – 6.67 (m, 2H), 3.86 (s, 3H); **<sup>13</sup>C NMR** (100 MHz, Chloroform-*d*)  $\delta$  144.9, 142.2, 135.5, 131.9, 129.9, 129.8, 129.7, 129.4, 129.3, 129.1, 128.2, 128.1, 125.0, 122.5, 121.4, 57.3; **HRMS** (ESI-TOF) *m/z*: [M + H]<sup>+</sup> Calcd. for [C<sub>18</sub>H<sub>16</sub>NO<sub>3</sub>S<sub>2</sub>]<sup>+</sup> 358.0566, found 358.0570.

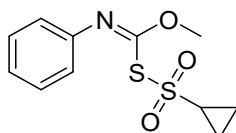

(*Z*)-Cyclopropanesulfonic (methyl (*E*)-phenylcarbonimidic) thioanhydride (**4g**). Yellow oil; Yield = 73%, 59.3 mg (PE/EA = 10:1);  $^1\text{H NMR}$  (400 MHz, Chloroform-*d*)  $\delta$  7.33 – 7.30(m, 2H), 7.16 – 7.12 (m, 1H), 6.85 – 6.82 (m, 2H), 4.11 (s, 3H), 1.48 – 1.44 (m, 2H), 1.23 – 1.19 (m, 2H);  $^{13}\text{C NMR}$  (100 MHz, Chloroform-*d*)  $\delta$  150.9, 145.3, 129.3, 125.1, 121.5, 57.5, 42.1, 8.4; **HRMS** (ESI-TOF)  $m/z$ :  $[\text{M} + \text{H}]^+$  Calcd. for  $[\text{C}_{11}\text{H}_{14}\text{NO}_3\text{S}_2]^+$  272.0410, found 272.0416.

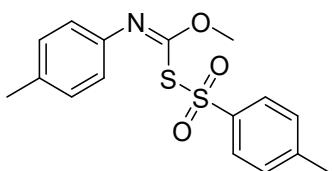

(*Z*)-(Methyl (*E*)-*p*-tolylcarbonimidic) 4-methylbenzenesulfonic thioanhydride (**4h**). Yellow oil; Yield = 76%, 76.4 mg (PE/EA = 10:1);  $^1\text{H NMR}$  (400 MHz, Chloroform-*d*)  $\delta$  7.86 – 7.84 (m, 2H), 7.37 – 7.34 (m, 2H), 7.12 – 7.07 (m, 3H), 6.66 – 6.64 (m, 2H), 3.93 (s, 3H), 2.47 (s, 3H), 2.31 (s, 3H);  $^{13}\text{C NMR}$  (100 MHz, Chloroform-*d*)  $\delta$  150.8, 145.5, 142.7, 142.4, 134.6, 129.9, 129.7, 128.0, 121.2, 57.2, 21.9, 21.0; **HRMS** (ESI-TOF)  $m/z$ :  $[\text{M} + \text{H}]^+$  Calcd. for  $[\text{C}_{16}\text{H}_{18}\text{NO}_3\text{S}_2]^+$  336.0723, found 336.0720.

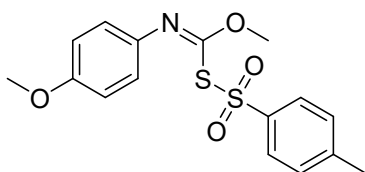

(*Z*)-(Methyl (*E*)-(4-methoxyphenyl)carbonimidic) 4-methylbenzenesulfonic thioanhydride (**4i**). Yellow oil; Yield = 75%, 78.9 mg (PE/EA = 10:1);  $^1\text{H NMR}$  (400 MHz, Chloroform-*d*)  $\delta$  7.85 – 7.83 (d,  $J = 8.4$  Hz, 2H), 7.36 – 7.34 (m, 2H), 6.83 – 6.79 (m, 2H), 6.71 – 6.67 (m, 2H), 3.92 (s, 3H), 3.77 (s, 3H), 2.47 (s, 3H);  $^{13}\text{C NMR}$  (100 MHz, Chloroform-*d*)  $\delta$  157.1, 150.9, 145.5, 142.7, 138.1, 129.7, 128.0, 122.5, 114.5, 57.2, 55.5, 21.9; **HRMS** (ESI-TOF)  $m/z$ :  $[\text{M} + \text{H}]^+$  Calcd. for  $[\text{C}_{16}\text{H}_{18}\text{NO}_4\text{S}_2]^+$  352.0672, found 352.0674.

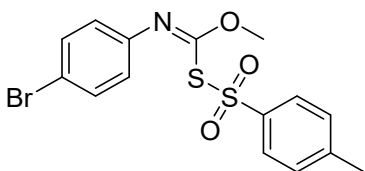

(*Z*)-(Methyl (*E*)-(4-bromophenyl)carbonimidic) 4-methylbenzenesulfonic thioanhydride (**4j**). Yellow oil; Yield = 71%, 84.8 mg (PE/EA = 10:1);  $^1\text{H NMR}$  (400 MHz, Chloroform-*d*)  $\delta$  7.86 – 7.82 (m, 2H), 7.39 – 7.37 (m, 3H), 7.36 – 7.34 (m, 1H), 6.65 – 6.62 (m, 2H), 3.93 (s, 3H), 2.48 (s, 3H);  $^{13}\text{C NMR}$  (100 MHz, Chloroform-*d*)  $\delta$  151.5, 145.8, 144.1, 142.6,

132.3, 129.8, 128.0, 123.2, 118.2, 57.4, 21.9; **HRMS** (ESI-TOF)  $m/z$ :  $[M + H]^+$  Calcd. for  $[C_{15}H_{15}BrNO_3S_2]^+$  399.9671, found 399.9665.

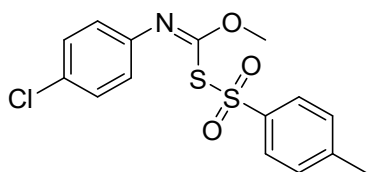

(*Z*)-(Methyl (*E*)-(4-chlorophenyl)carbonimidic) 4-methylbenzenesulfonic thioanhydride (**4k**). Yellow oil; Yield = 76%, 80.9 mg (PE/EA = 10:1); **<sup>1</sup>H NMR** (400 MHz, Chloroform-*d*)  $\delta$  7.86 – 7.82 (m, 2H), 7.37 – 7.35 (m, 2H), 7.25 – 7.22 (m, 2H), 6.71 – 6.67 (m, 2H), 3.93 (s, 3H), 2.48 (s, 3H); **<sup>13</sup>C NMR** (100 MHz, Chloroform-*d*)  $\delta$  151.5, 145.7, 143.5, 142.5, 130.3, 129.7, 129.3, 127.9, 122.7, 57.3, 21.8; **HRMS** (ESI-TOF)  $m/z$ :  $[M + H]^+$  Calcd. for  $[C_{15}H_{15}ClNO_3S_2]^+$  356.0176, found 356.0169.

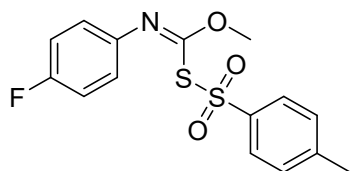

(*Z*)-(Methyl (*E*)-(4-fluorophenyl)carbonimidic) 4-methylbenzenesulfonic thioanhydride (**4l**). Yellow oil; Yield = 71%, 72.2 mg (PE/EA = 10:1); **<sup>1</sup>H NMR** (400 MHz, Chloroform-*d*)  $\delta$  7.85 – 7.83 (m, 2H), 7.37 – 7.35 (m, 2H), 6.99 – 6.94 (m, 2H), 6.73 – 6.69 (m, 2H), 3.93 (s, 3H), 2.47 (s, 3H); **<sup>13</sup>C NMR** (100 MHz, Chloroform-*d*)  $\delta$  160.3 (d,  $J = 242$ ), 151.5, 145.7, 142.6, 141.10, 141.07, 129.9, 128.0, 123.0, 122.8, 115.5 (d,  $J = 21.0$ ), 57.3, 21.9; **<sup>19</sup>F NMR** (376 MHz, DPBP)  $\delta$  -116.05; **HRMS** (ESI-TOF)  $m/z$ :  $[M + H]^+$  Calcd. for  $[C_{15}H_{15}FNO_3S_2]^+$  340.0472, found 340.0473.

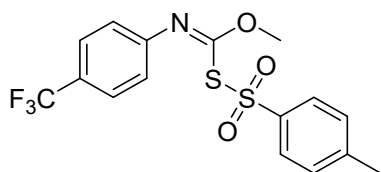

(*Z*)-(Methyl (*E*)-(4-(trifluoromethyl)phenyl)carbonimidic) 4-methylbenzenesulfonic thioanhydride (**4m**). Yellow oil; Yield = 72%, 84.0 mg (PE/EA = 10:1); **<sup>1</sup>H NMR** (400 MHz, Chloroform-*d*)  $\delta$  7.85 – 7.83 (m, 2H), 7.54 – 7.52 (m, 2H), 7.38 – 7.36 (m, 2H), 6.86 – 6.84 (m, 2H), 3.96 (s, 3H), 2.48 (s, 3H); **<sup>13</sup>C NMR** (100 MHz, Chloroform-*d*)  $\delta$  151.8, 148.3, 145.9, 142.5, 129.9, 128.0, 126.5 (d,  $J = 4$ ), 121.8, 57.5, 21.9; **<sup>19</sup>F NMR** (376 MHz, DPBP)  $\delta$  -61.90; **HRMS** (ESI-TOF)  $m/z$ :  $[M + H]^+$  Calcd. for  $[C_{16}H_{15}F_3NO_3S_2]^+$  390.0440, found 390.0440.

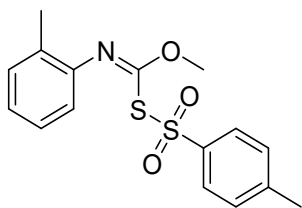

(*Z*)-(Methyl (*E*)-*o*-tolylcarbonimidic) 4-methylbenzenesulfonic thioanhydride (**4n**). Yellow oil; Yield = 74%, 74.4 mg (PE/EA = 10:1);  $^1\text{H NMR}$  (400 MHz, Chloroform-*d*)  $\delta$  7.87 – 7.85 (m, 2H), 7.37 – 7.35 (m, 2H), 7.17 – 7.15 (m, 1H), 7.12 – 7.08 (m, 1H), 7.07 – 7.02 (m, 1H), 6.63 – 6.60 (m, 1H), 3.98 (s, 3H), 2.47 (s, 3H), 2.08 (s, 3H);  $^{13}\text{C NMR}$  (100 MHz, Chloroform-*d*)  $\delta$  150.5, 145.6, 143.5, 142.6, 130.7, 129.7, 129.4, 127.9, 126.6, 125.1, 120.8, 57.2, 21.8, 17.8.; **HRMS** (ESI-TOF)  $m/z$ :  $[\text{M} + \text{H}]^+$  Calcd. for  $[\text{C}_{16}\text{H}_{18}\text{NO}_3\text{S}_2]^+$  336.0723, found 336.0715.

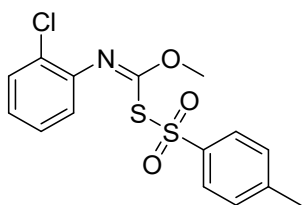

(*Z*)-(Methyl (*E*)-(2-chlorophenyl)carbonimidic) 4-methylbenzenesulfonic thioanhydride (**4o**). Yellow oil; Yield = 76%, 80.9 mg (PE/EA = 10:1);  $^1\text{H NMR}$  (400 MHz, Chloroform-*d*)  $\delta$  7.86 – 7.84 (m, 2H), 7.37 – 7.34 (m, 3H), 7.20 – 7.15 (m, 1H), 7.07 – 7.03 (m, 1H), 6.79 – 6.77 (m, 1H), 3.99 (s, 3H), 2.48 (s, 3H);  $^{13}\text{C NMR}$  (100 MHz, Chloroform-*d*)  $\delta$  152.7, 145.7, 142.5, 142.2, 130.1, 129.8, 128.0, 127.5, 126.1, 125.9, 122.7, 57.6, 21.9; **HRMS** (ESI-TOF)  $m/z$ :  $[\text{M} + \text{H}]^+$  Calcd. for  $[\text{C}_{15}\text{H}_{15}\text{ClNO}_3\text{S}_2]^+$  356.0176, found 356.0179.

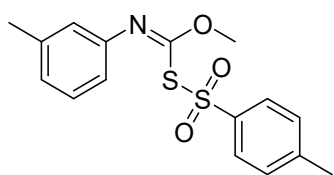

(*Z*)-(Methyl (*E*)-*m*-tolylcarbonimidic) 4-methylbenzenesulfonic thioanhydride(**4p**). Yellow oil; Yield = 72%, 72.4 mg (PE/EA = 10:1);  $^1\text{H NMR}$  (400 MHz, Chloroform-*d*)  $\delta$  7.86 – 7.84 (m, 2H), 7.37 – 7.35 (m, 2H), 7.17 – 7.14 (m, 1H), 6.94 – 6.92 (m, 1H), 6.57 – 6.53 (m, 2H), 3.93 (s, 3H), 2.48 (s, 3H), 2.31 (s, 3H);  $^{13}\text{C NMR}$  (100 MHz, Chloroform-*d*)  $\delta$  150.7, 145.5, 144.8, 142.6, 139.2, 129.6, 129.0, 127.9, 125.7, 121.9, 118.3, 57.1, 21.8, 21.4; **HRMS** (ESI-TOF)  $m/z$ :  $[\text{M} + \text{H}]^+$  Calcd. for  $[\text{C}_{16}\text{H}_{18}\text{NO}_3\text{S}_2]^+$  336.0723, found 336.0717.

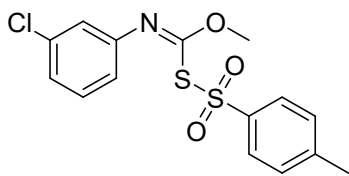

(*Z*)-(Methyl (*E*)-(3-chlorophenyl)carbonimidic) 4-methylbenzenesulfonic thioanhydride (**4q**). Yellow oil; Yield = 77%, 82.0 mg (PE/EA = 10:1);  $^1\text{H NMR}$  (400 MHz, Chloroform-*d*)  $\delta$  7.86 – 7.84 (m, 2H), 7.37 – 7.33 (m, 3H), 7.20 – 7.16 (m, 1H), 7.07 – 7.03 (m, 1H), 6.79 – 6.77 (m, 1H), 3.99 (s, 3H), 2.48 (s, 3H);  $^{13}\text{C NMR}$  (100 MHz, Chloroform-*d*)  $\delta$  152.7, 145.7, 142.5, 142.2, 130.0, 129.7, 128.0, 127.5, 126.1, 125.8, 122.7, 57.6, 21.8.; **HRMS** (ESI-TOF)  $m/z$ :  $[\text{M} + \text{H}]^+$  Calcd. for  $[\text{C}_{15}\text{H}_{15}\text{ClNO}_3\text{S}_2]^+$  356.0176, found 356.0174.

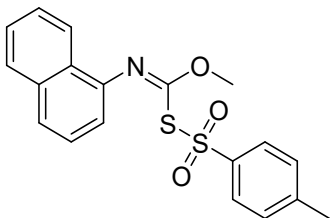

(*Z*)-(Methyl (*E*)-naphthalen-1-ylcarbonimidic) 4-methylbenzenesulfonic thioanhydride (**4r**). Yellow oil; Yield = 73%, 81.2 mg (PE/EA = 10:1);  $^1\text{H NMR}$  (400 MHz, Chloroform-*d*)  $\delta$  7.84 – 7.81 (m, 3H), 7.77 – 7.75 (m, 1H), 7.65 – 7.63 (m, 1H), 7.53 – 7.48 (m, 1H), 7.47 – 7.43 (m, 1H), 7.38 – 7.31 (m, 3H), 6.81 – 6.78 (m, 1H), 4.12 (s, 3H), 2.46 (s, 3H);  $^{13}\text{C NMR}$  (100 MHz, Chloroform-*d*)  $\delta$  145.5, 142.5, 141.3, 134.2, 129.7, 128.1, 127.9, 127.0, 126.6, 126.0, 125.6, 125.3, 123.3, 116.6, 57.5, 21.9; **HRMS** (ESI-TOF)  $m/z$ :  $[\text{M} + \text{H}]^+$  Calcd. for  $[\text{C}_{19}\text{H}_{18}\text{NO}_3\text{S}_2]^+$  372.0723, found 372.0724.

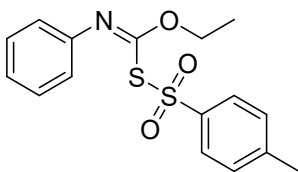

(*Z*)-(Ethyl (*E*)-phenylcarbonimidic) 4-methylbenzenesulfonic thioanhydride (**4s**). Yellow oil; Yield = 78%, 78.4 mg (PE/EA = 10:1);  $^1\text{H NMR}$  (400 MHz, Chloroform-*d*)  $\delta$  7.88 – 7.86 (m, 2H), 7.36 – 7.34 (m, 2H), 7.29 – 7.26 (m, 2H), 7.13 – 7.10 (m, 1H), 6.79 – 6.75 (m, 2H), 4.41 – 4.37 (m, 2H), 2.47 (s, 3H), 1.37 – 1.34 (s, 3H);  $^{13}\text{C NMR}$  (100 MHz, Chloroform-*d*)  $\delta$  150.2, 145.5, 145.1, 142.6, 129.6, 129.2, 128.0, 124.9, 121.4, 66.8, 21.9, 14.0; **HRMS** (ESI-TOF)  $m/z$ :  $[\text{M} + \text{H}]^+$  Calcd. for  $[\text{C}_{16}\text{H}_{18}\text{NO}_3\text{S}_2]^+$  336.0723, found 336.0720.

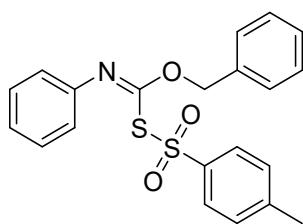

(*Z*)-(Benzyl (*E*)-phenylcarbonimidic) 4-methylbenzenesulfonic thioanhydride (**4t**). Yellow oil; Yield = 72%, 85.8 mg (PE/EA = 10:1);  $^1\text{H NMR}$  (400 MHz, Chloroform-*d*)  $\delta$  7.55 – 7.53(m, 2H), 7.45 – 7.42 (m, 5H), 7.32 – 7.29 (m, 2H), 7.16 – 7.12 (m, 1H), 7.03 – 7.01 (m, 2H), 6.81 – 6.80 (m, 2H), 5.33 (s, 2H), 2.38 (s, 3H);  $^{13}\text{C NMR}$  (100 MHz, Chloroform-*d*)  $\delta$  150.2, 145.1, 144.9, 142.4, 134.7, 129.6, 129.4, 129.3, 128.9, 128.7, 127.9, 125.05, 121.44, 77.41, 76.91, 72.55, 21.81; **HRMS** (ESI-TOF)  $m/z$ :  $[\text{M} + \text{H}]^+$  Calcd. for  $[\text{C}_{21}\text{H}_{20}\text{NO}_3\text{S}_2]^+$  398.0879, found 398.0880.

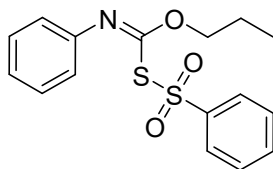

(*Z*)-benzenesulfonic (propyl (*E*)-phenylcarbonimidic) thioanhydride (**4u**). Yellow oil; Yield = 74%, 74.4 mg (PE/EA = 10:1);  $^1\text{H NMR}$  (400 MHz, Chloroform-*d*)  $\delta$  8.00 – 7.97 (m, 2H), 7.70 – 7.62 (m, 1H), 7.56 (dd, 2H), 7.31 – 7.26 (m, 2H), 7.16 – 7.08 (m, 1H), 6.82 – 6.72 (m, 2H), 4.28 (t, 2H), 1.72 (q, 2H), 0.94 (t, 3H).  $^{13}\text{C NMR}$  (100 MHz, Chloroform-*d*)  $\delta$  150.1, 145.5, 145.1, 134.2, 129.3, 129.2, 127.8, 125.0, 121.5, 72.6, 21.8, 10.5. **HRMS** (ESI-TOF)  $m/z$ :  $[\text{M} + \text{Na}]^+$  Calcd. for  $[\text{C}_{16}\text{H}_{17}\text{NO}_3\text{S}_2\text{Na}]^+$  358.0542, found 358.0524.

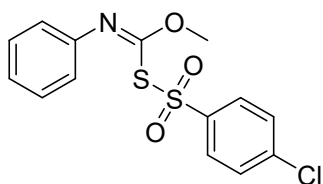

(*Z*)-4-chlorobenzenesulfonic (methyl (*E*)-phenylcarbonimidic) thioanhydride. Yellow oil; Yield = 68%, 69.6 mg (PE/EA = 10:1);  $^1\text{H NMR}$  (400 MHz, Chloroform-*d*)  $\delta$  8.01 – 7.95 (m, 2H), 7.70 – 7.65 (m, 1H), 7.58 (m, *m* 2H), 7.35 (m, 1H), 7.18 (m, 1H), 7.08 – 7.03 (m, 1H), 6.77 (m, 1H), 3.98 (s, 3H).  $^{13}\text{C NMR}$  (100 MHz, Chloroform-*d*)  $\delta$  152.4, 145.3, 142.2, 134.4, 130.05, 129.2, 127.9, 127.6, 126.1, 125.9, 122.7, 57.6. **HRMS** (ESI-TOF)  $m/z$ :  $[\text{M} + \text{Na}]^+$  Calcd. for  $[\text{C}_{14}\text{H}_{12}\text{ClNO}_3\text{S}_2\text{Na}]^+$  363.9839, found 363.9831.

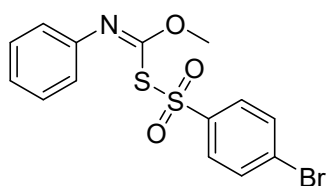

(*Z*)-4-bromobenzenesulfonic (methyl (*E*)-phenylcarbonimidic) thioanhydride. Yellow oil; Yield = 68%, 75.1 mg (PE/EA = 10:1);  $^1\text{H}$  NMR (400 MHz, Chloroform-*d*)  $\delta$  7.99 – 7.95 (m, 2H), 7.70-7.66 (m, 1H), 7.60-7.56 (m, 2H), 7.36-7.34 (m, 1H), 7.20-7.16 (m, 1H), 7.07-7.03 (m, 1H), 6.78-6.76 (m, 1H), 3.98 (s, 3H).  $^{13}\text{C}$  NMR (100 MHz, Chloroform-*d*)  $\delta$  152.4, 145.3, 142.15, 134.4, 130.0, 129.2, 127.9, 127.5, 126.1, 125.9, 122.7, 57.6. **HRMS** (ESI-TOF)  $m/z$ :  $[\text{M} + \text{H}]^+$  Calcd. for  $[\text{C}_{14}\text{H}_{12}\text{BrNO}_3\text{S}_2]^+$  385.9442, found 385.9440.



## 4. Copies of $^{13}\text{C}$ and $^1\text{H}$ NMR spectra for all product

$^1\text{H}$  and  $^{13}\text{C}$  NMR Spectrum of **4a** (400 MHz, Chloroform-*d*).

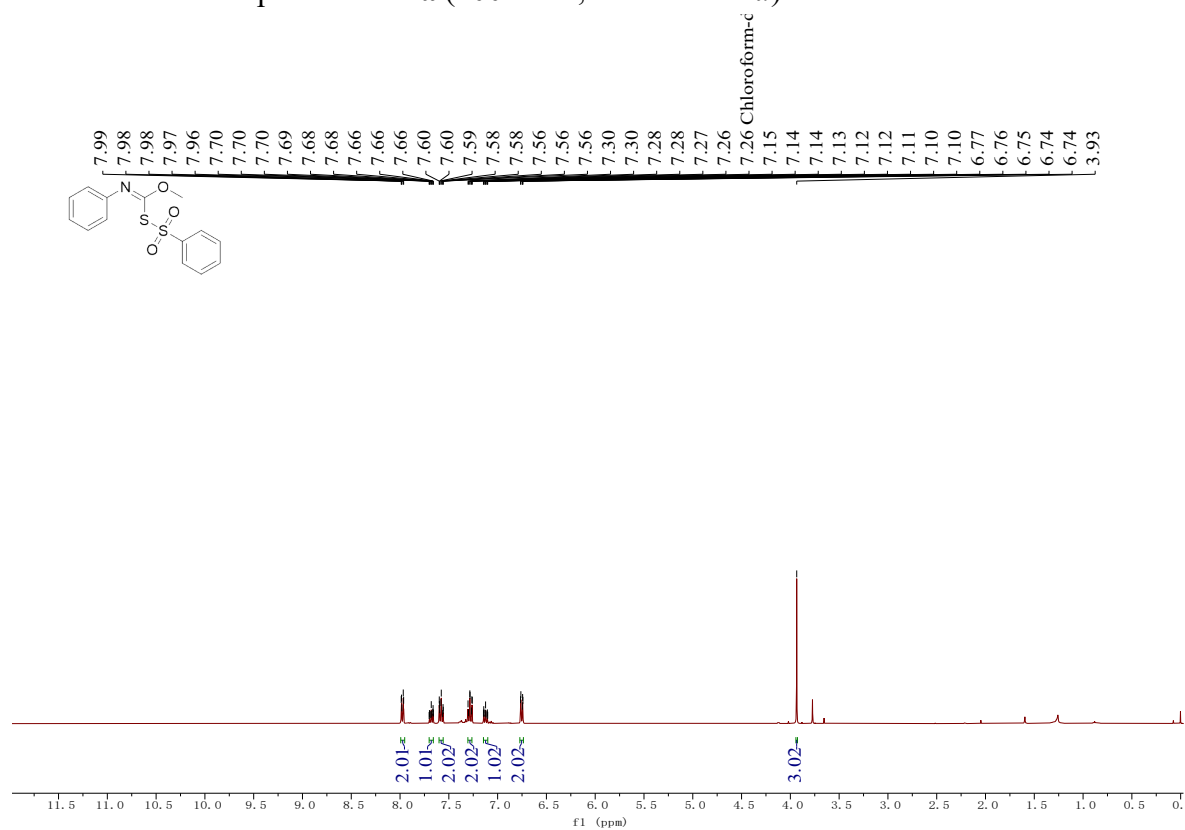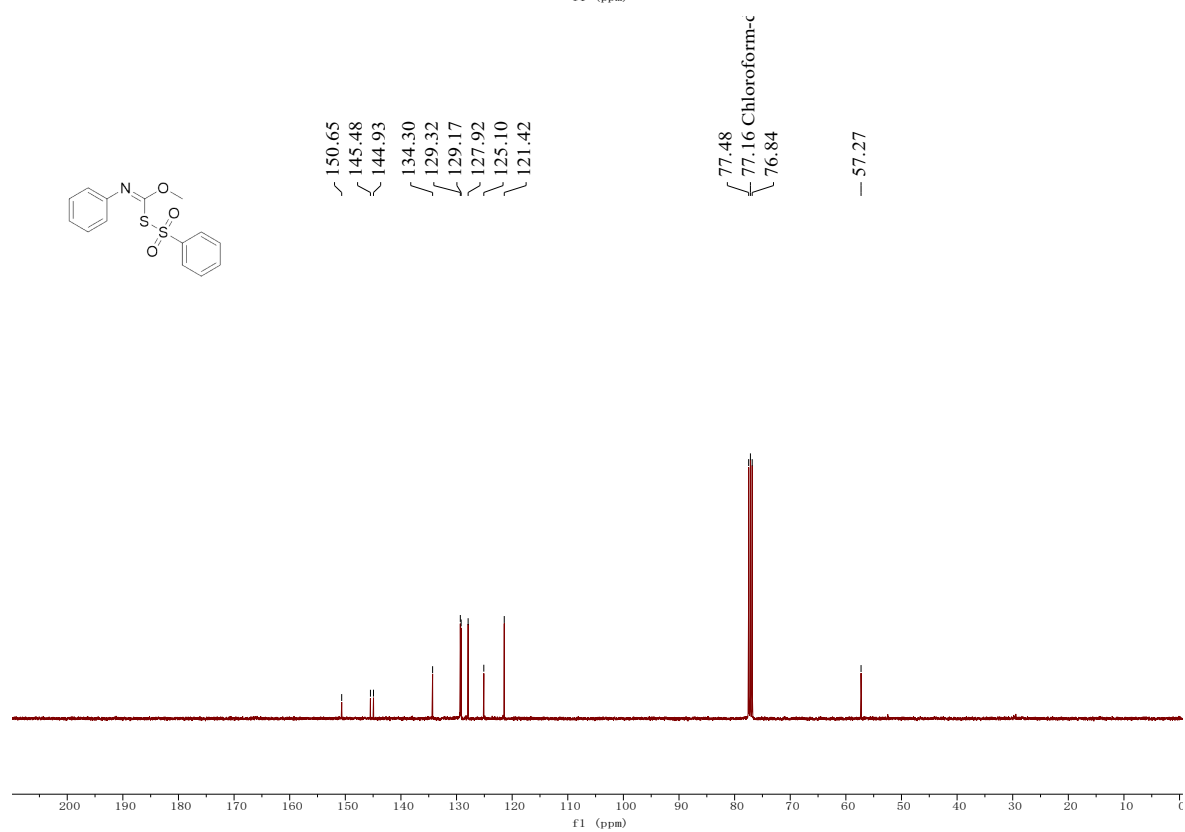

<sup>1</sup>H and <sup>13</sup>C NMR Spectrum of **4b** (400 MHz, Chloroform-*d*).

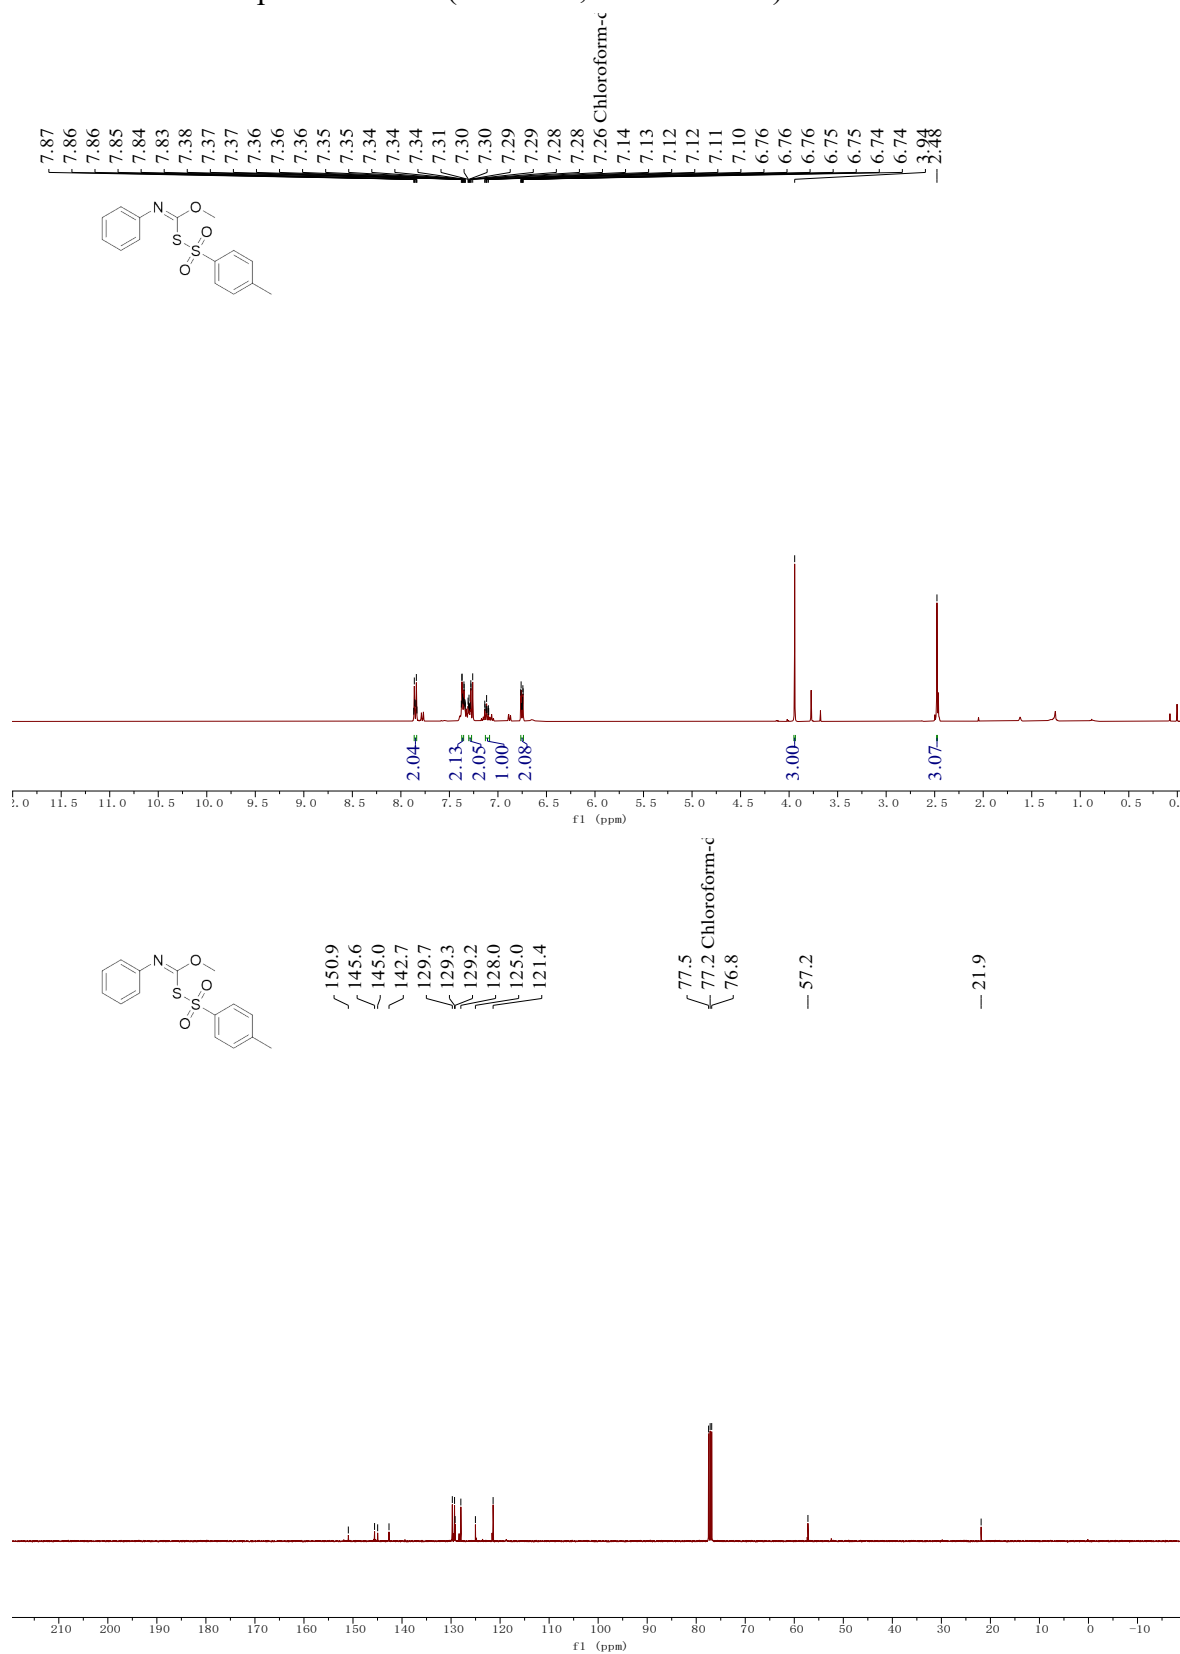

<sup>1</sup>H and <sup>13</sup>C NMR Spectrum of **4c** (400 MHz, Chloroform-*d*).

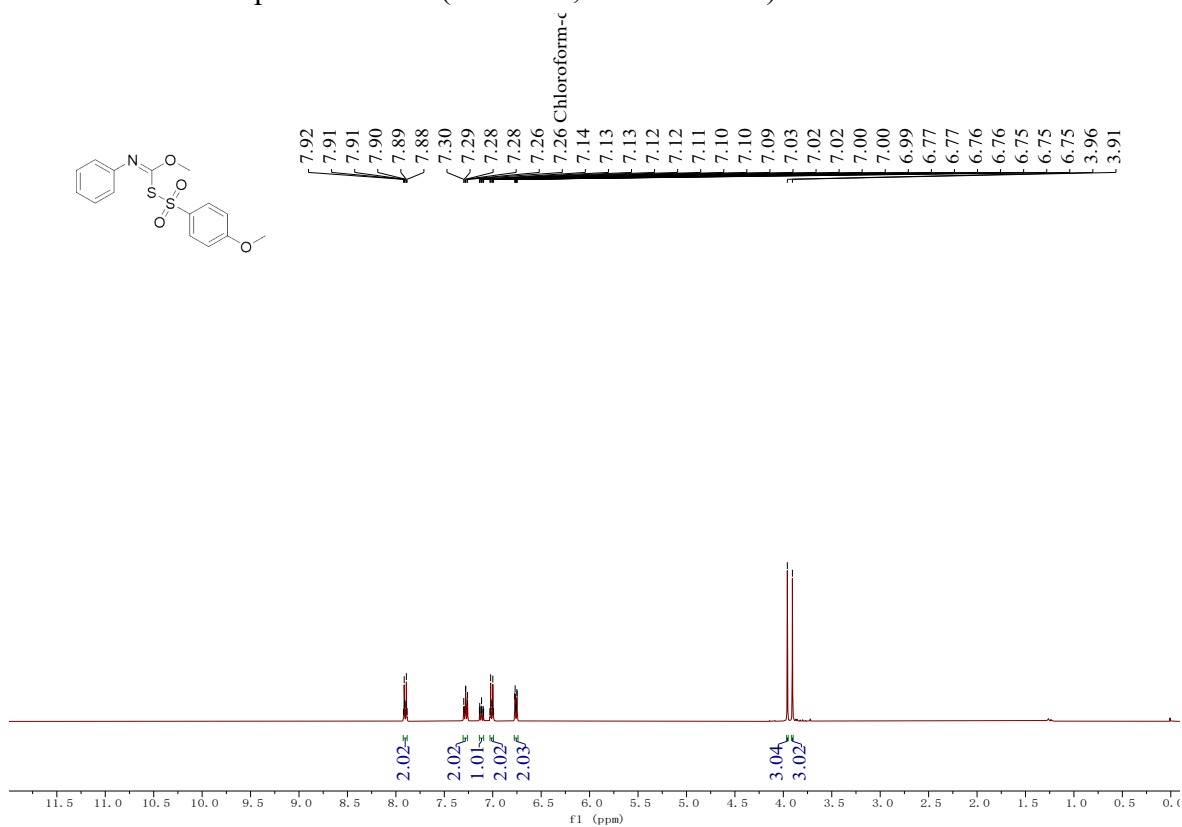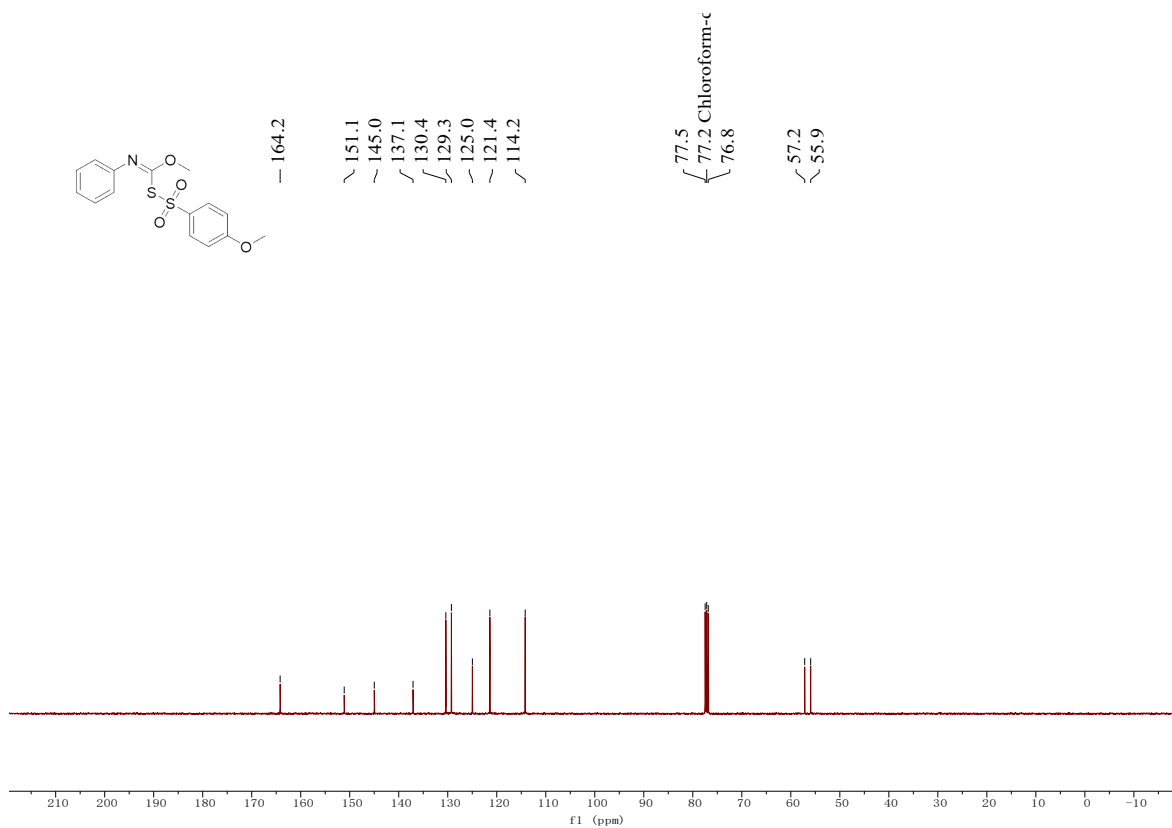

$^1\text{H}$  and  $^{13}\text{C}$  NMR Spectrum of **4d** (400 MHz, Chloroform-*d*).

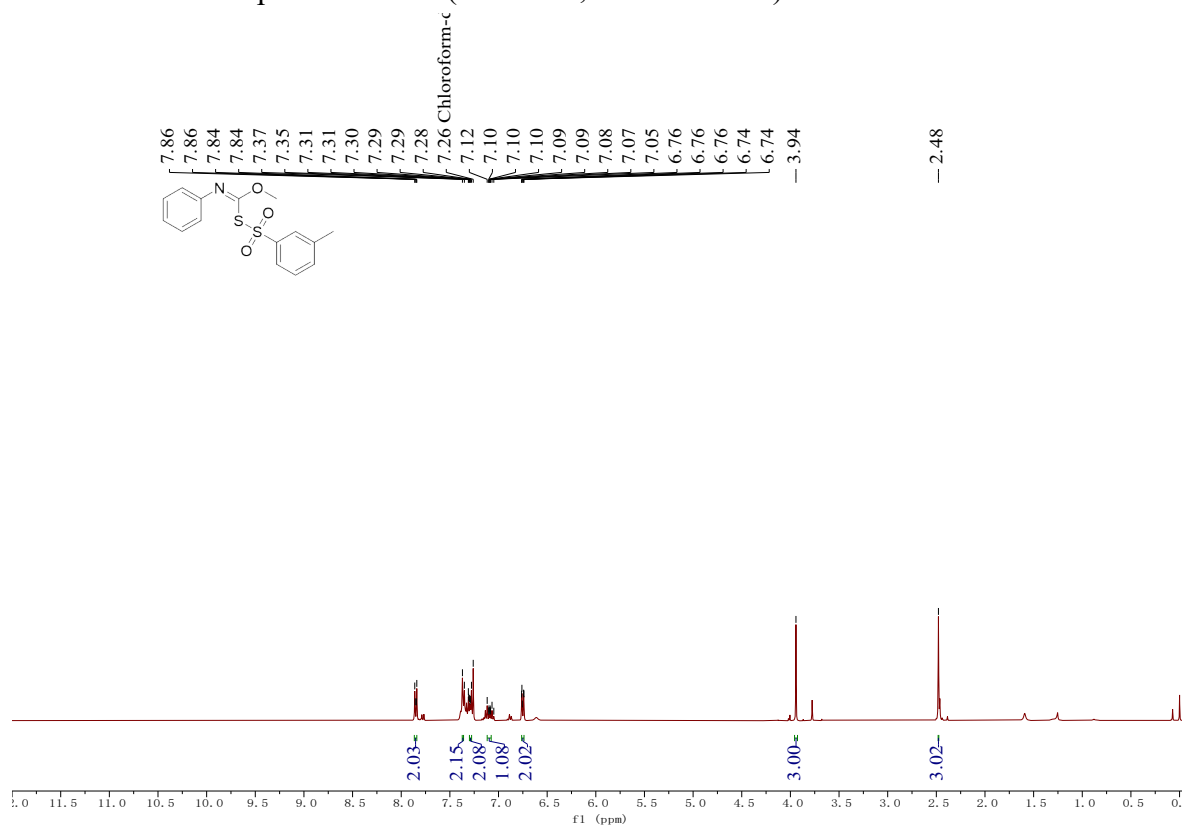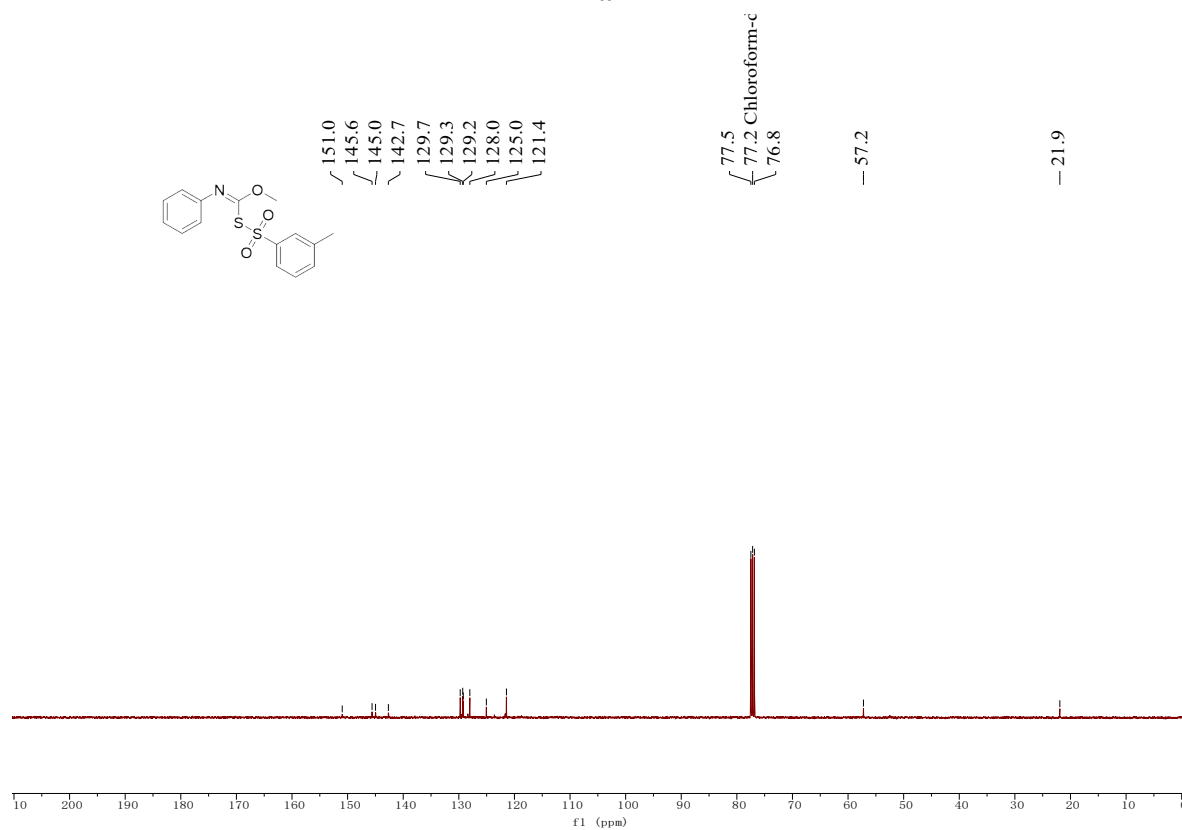

$^1\text{H}$  and  $^{13}\text{C}$  NMR Spectrum of **4e** (400 MHz, Chloroform-*d*).

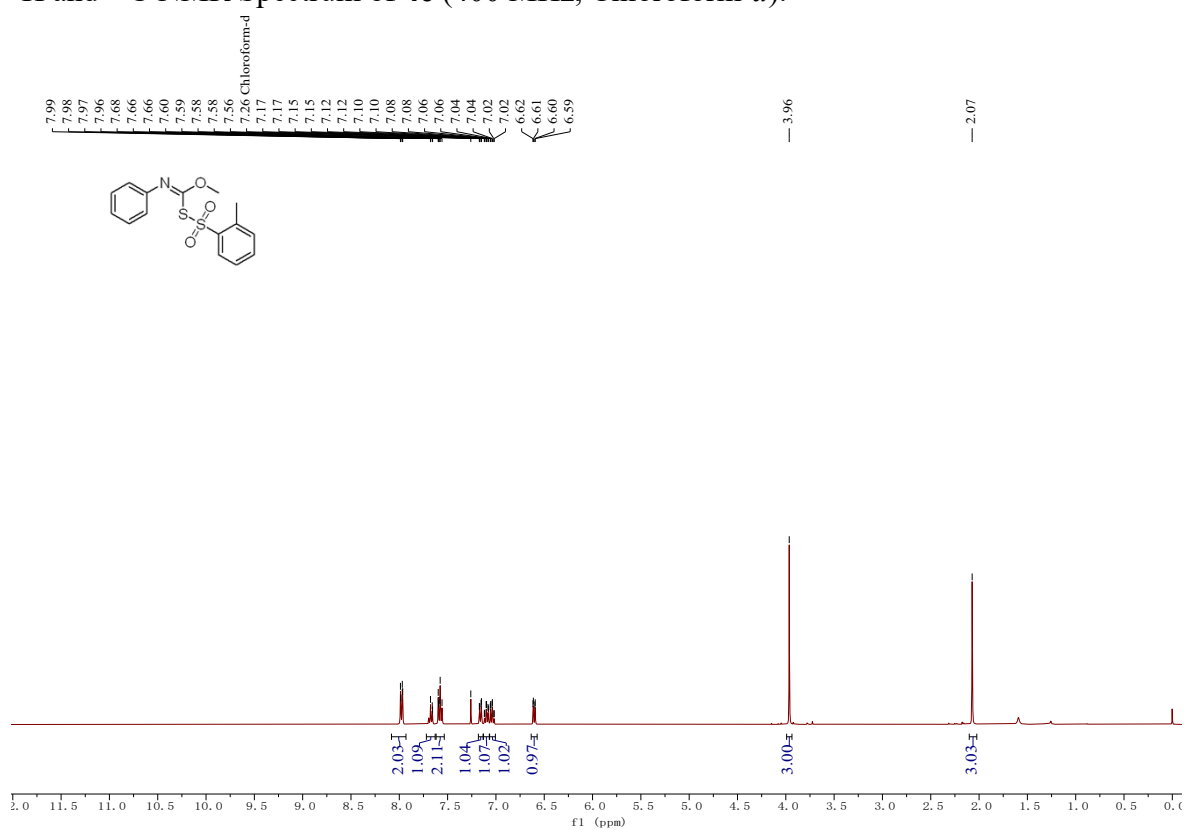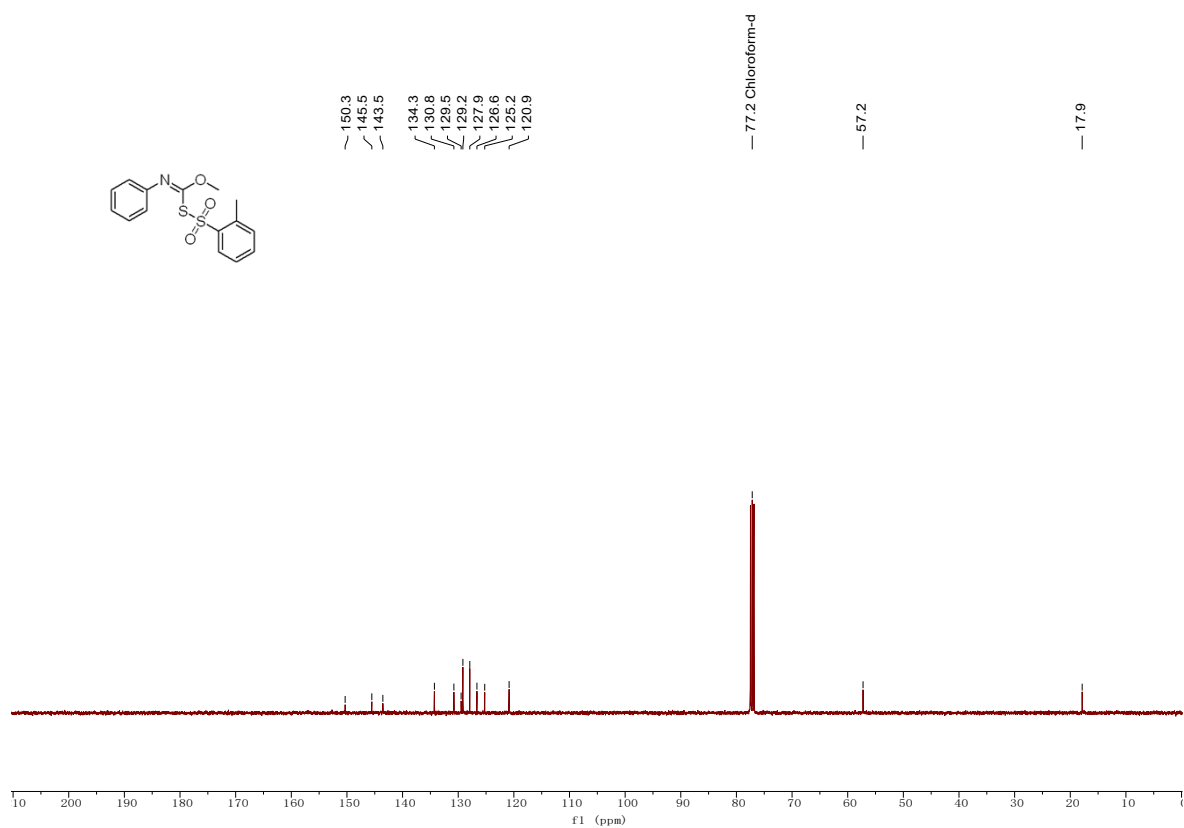

$^1\text{H}$  and  $^{13}\text{C}$  NMR Spectrum of **4f** (400 MHz, Chloroform-*d*).

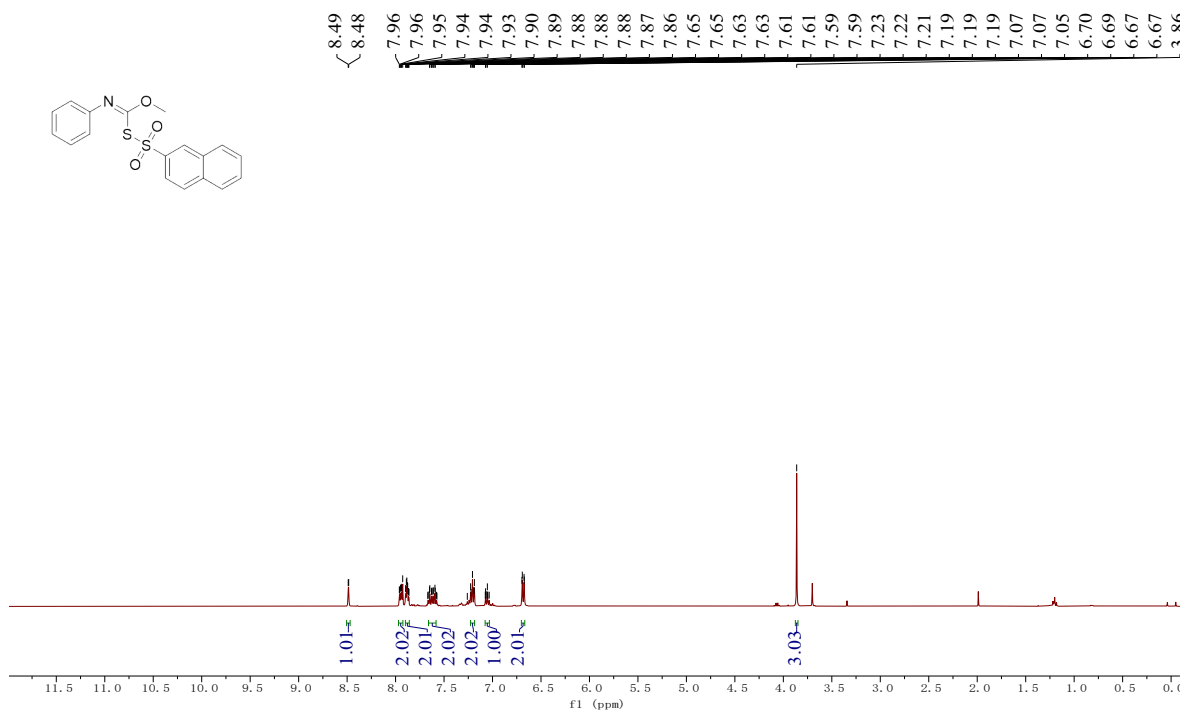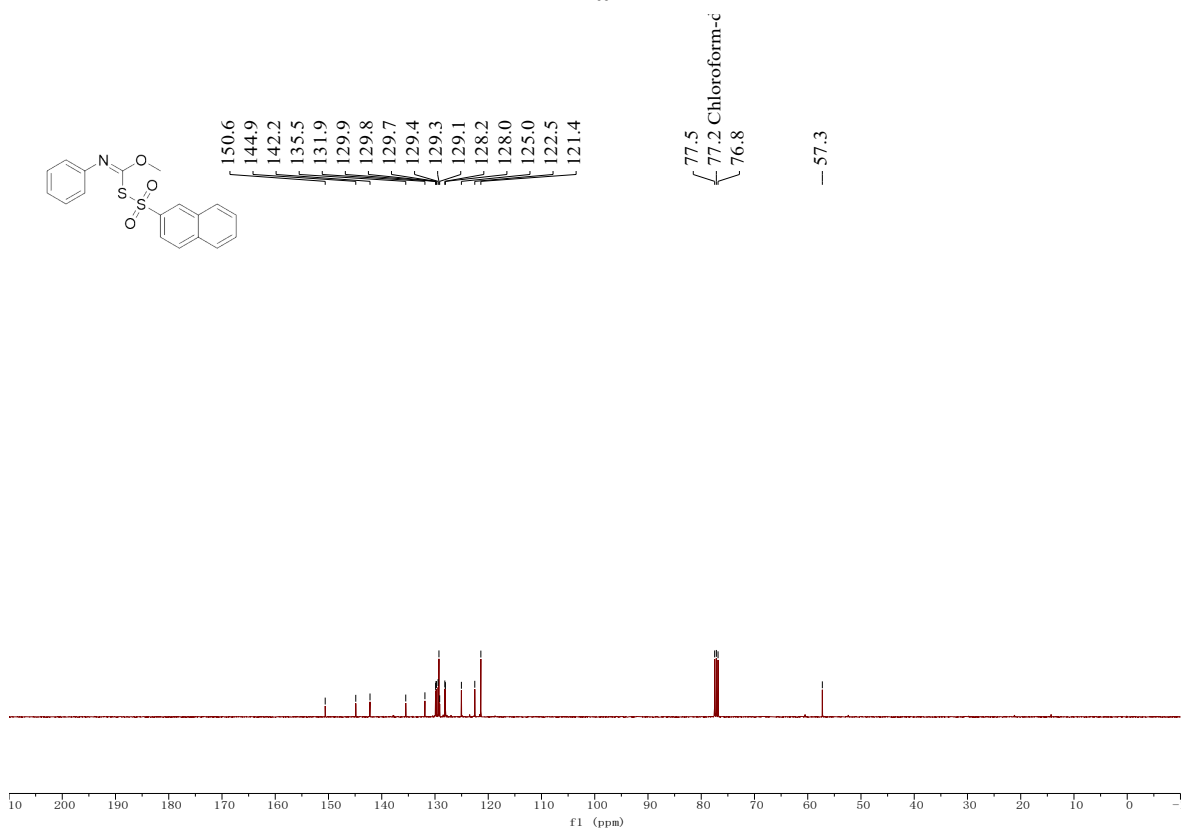

<sup>1</sup>H and <sup>13</sup>C NMR Spectrum of **4g** (400 MHz, Chloroform-*d*).

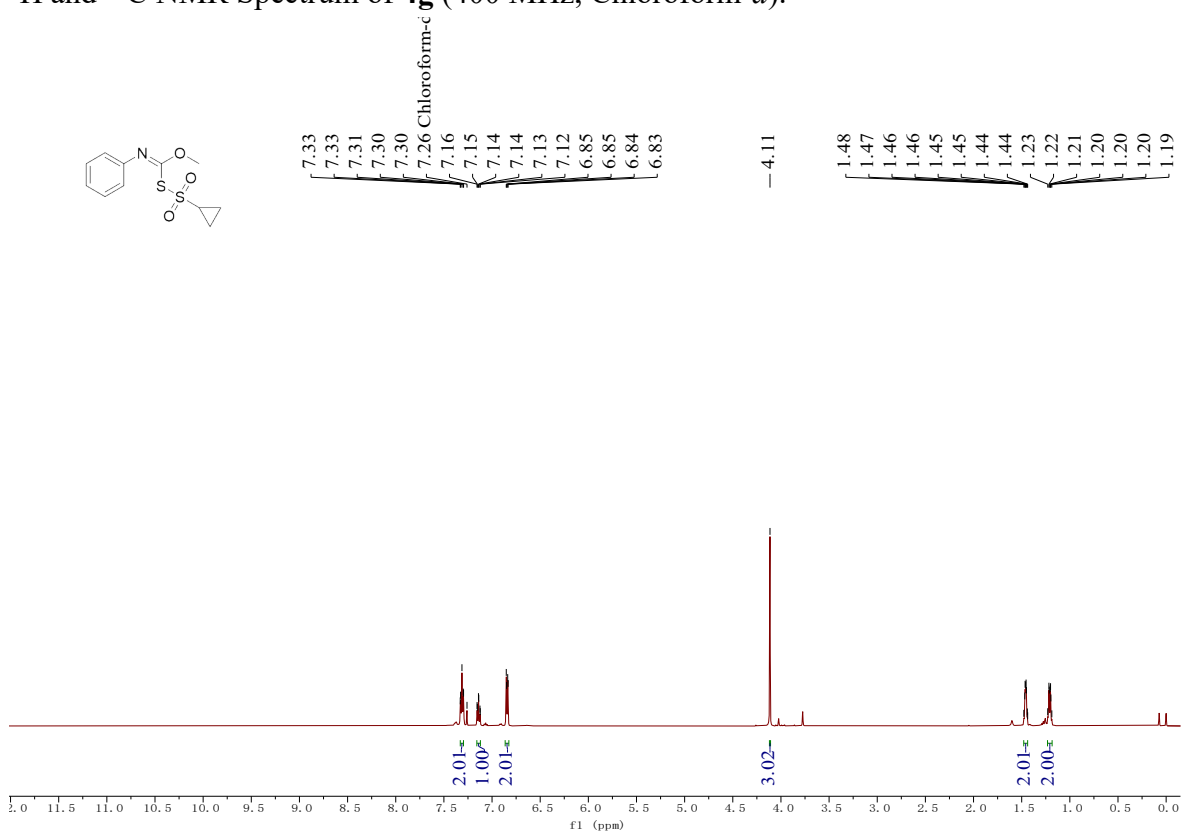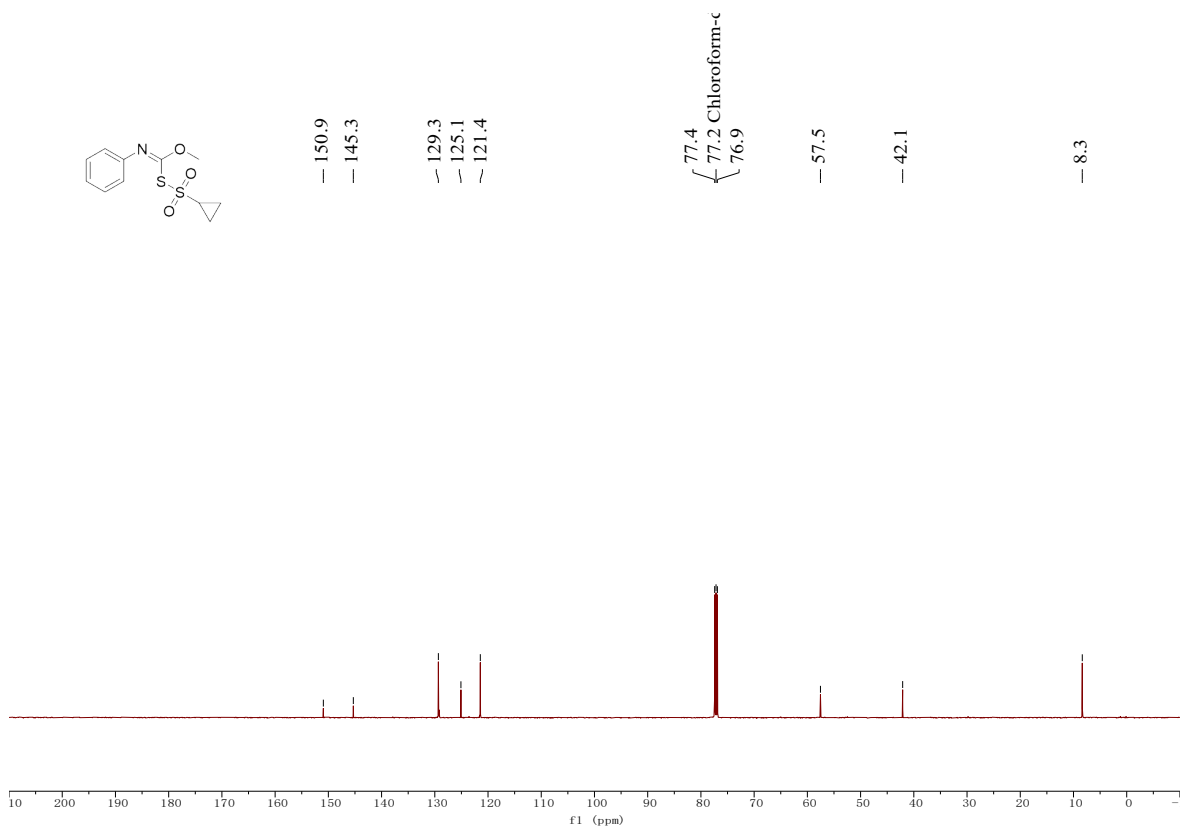

<sup>1</sup>H and <sup>13</sup>C NMR Spectrum of **4h** (400 MHz, Chloroform-*d*).

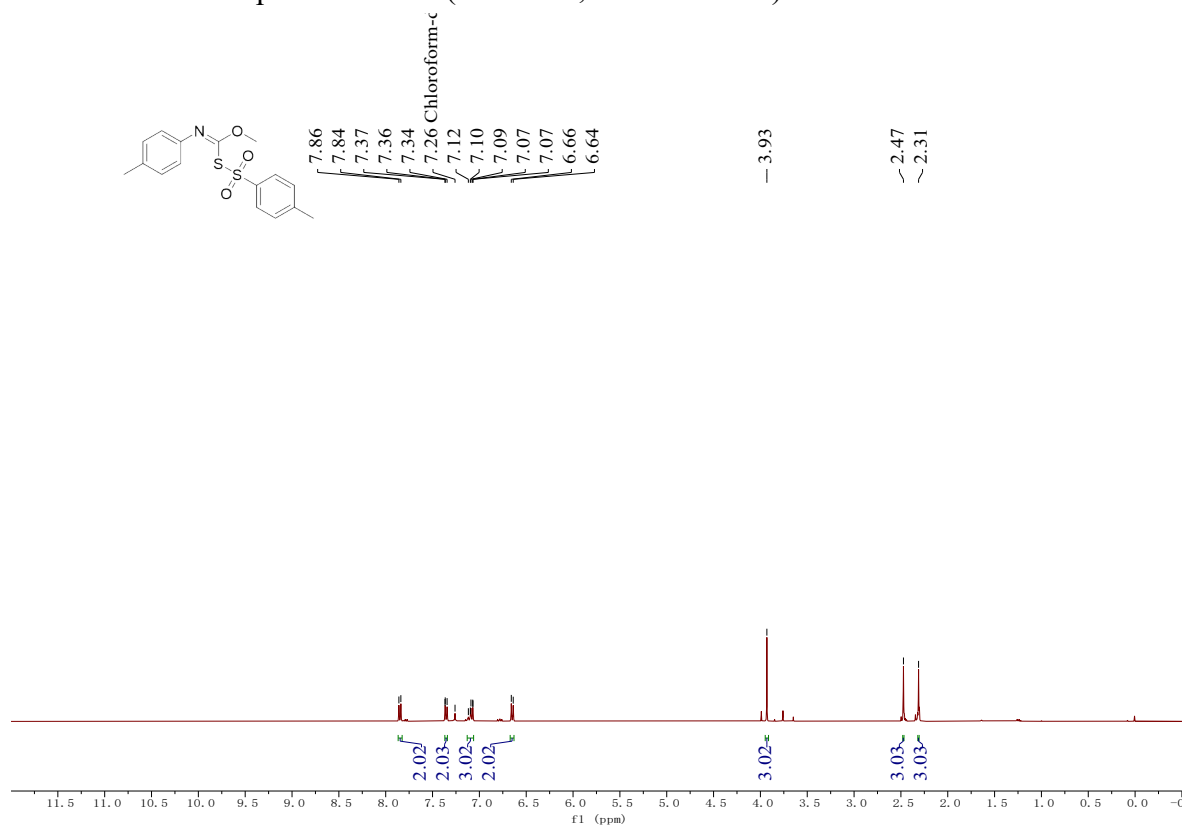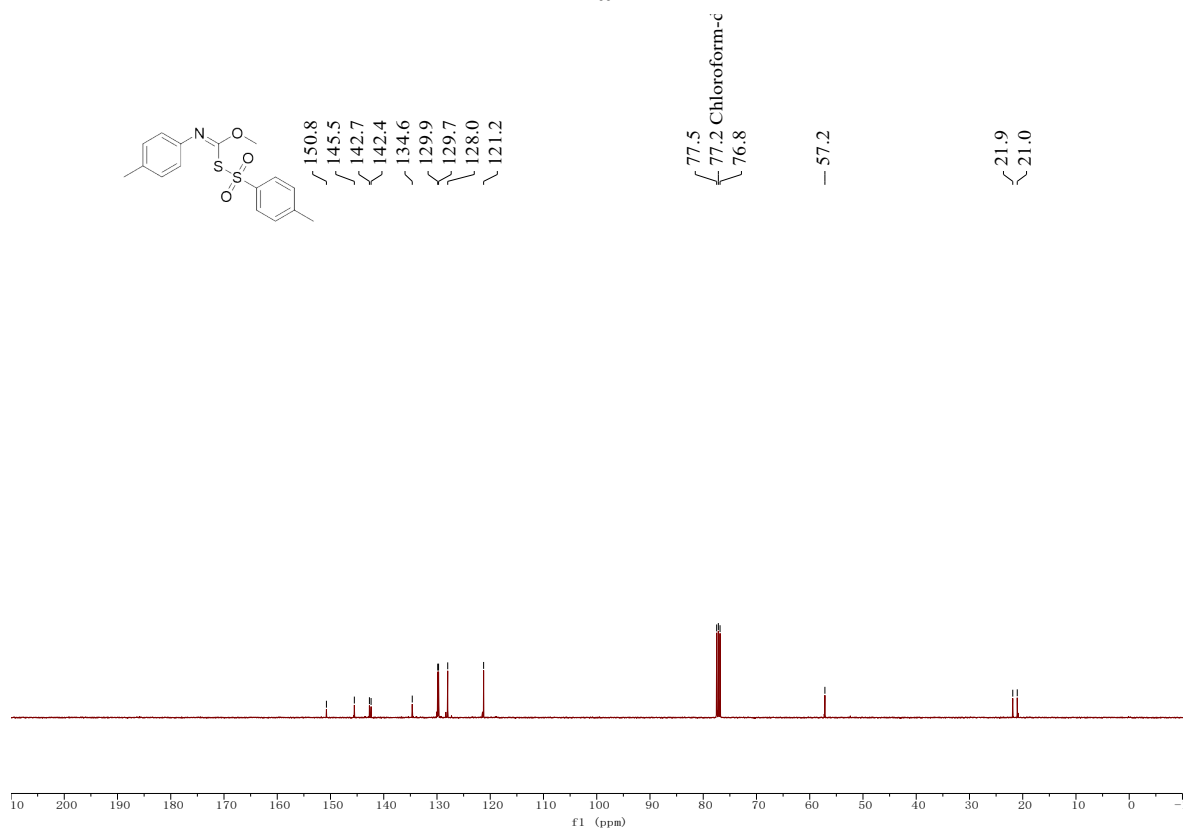



$^1\text{H}$  and  $^{13}\text{C}$  NMR Spectrum of **4i** (400 MHz, Chloroform-*d*).

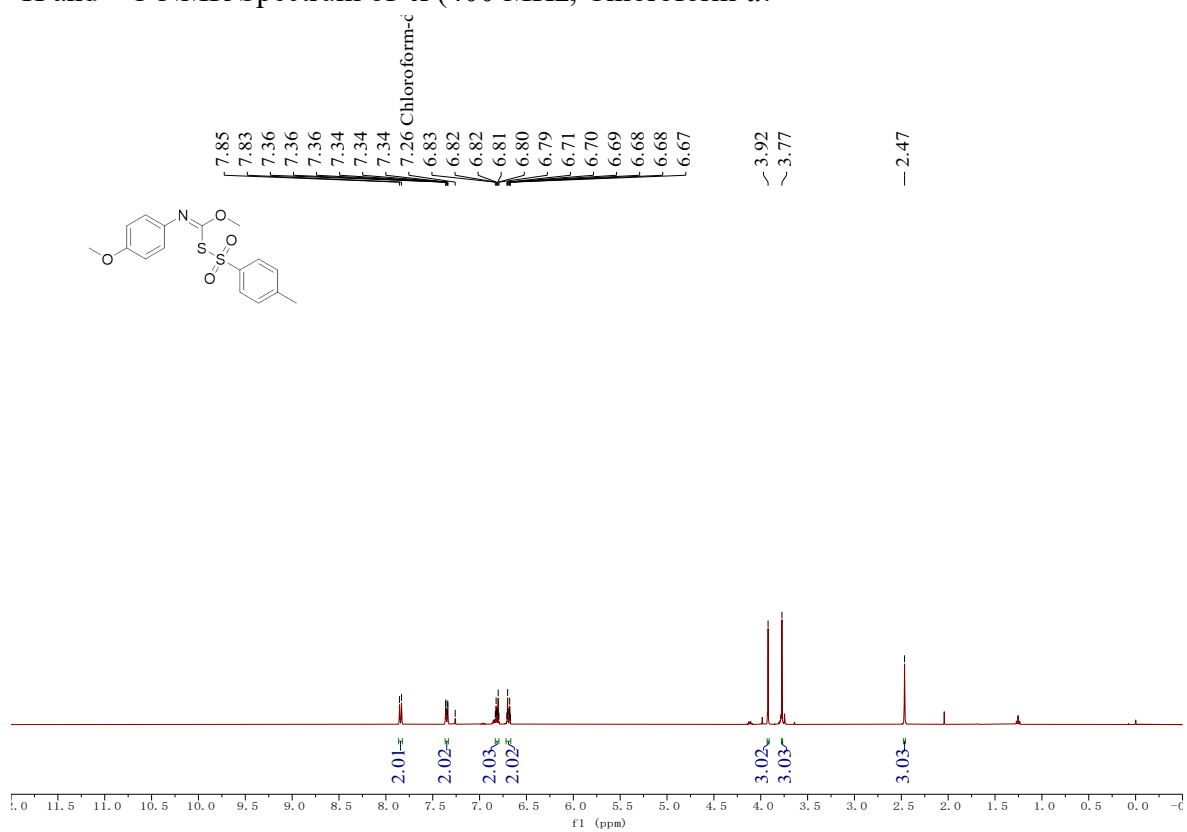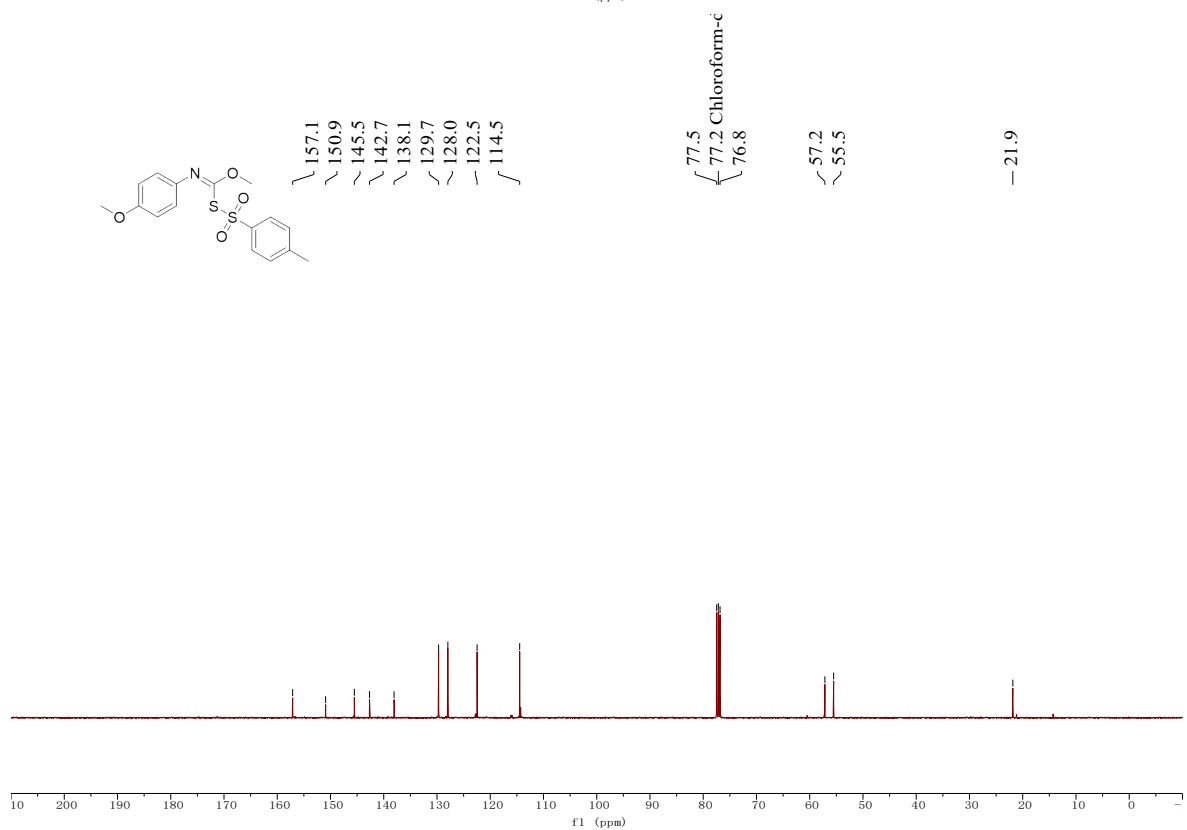

$^1\text{H}$  and  $^{13}\text{C}$  NMR Spectrum of **4j** (500 MHz, Chloroform-*d*).

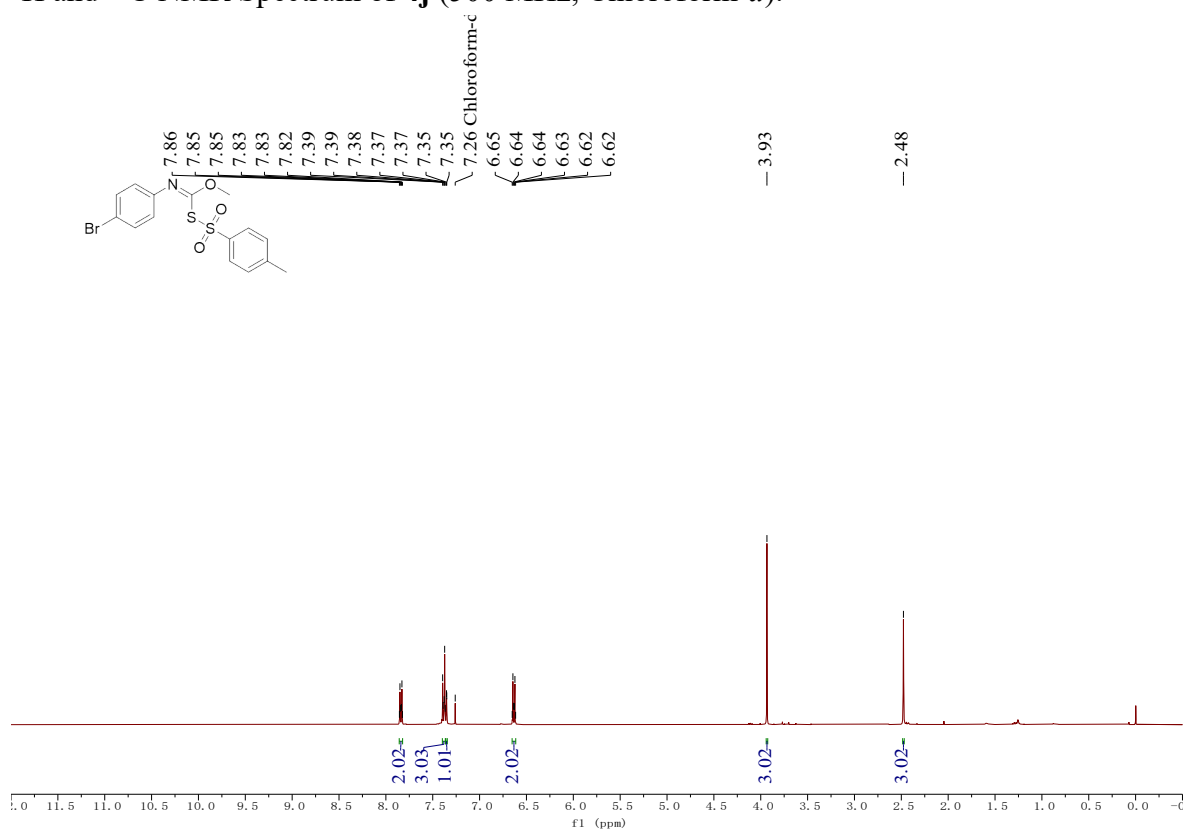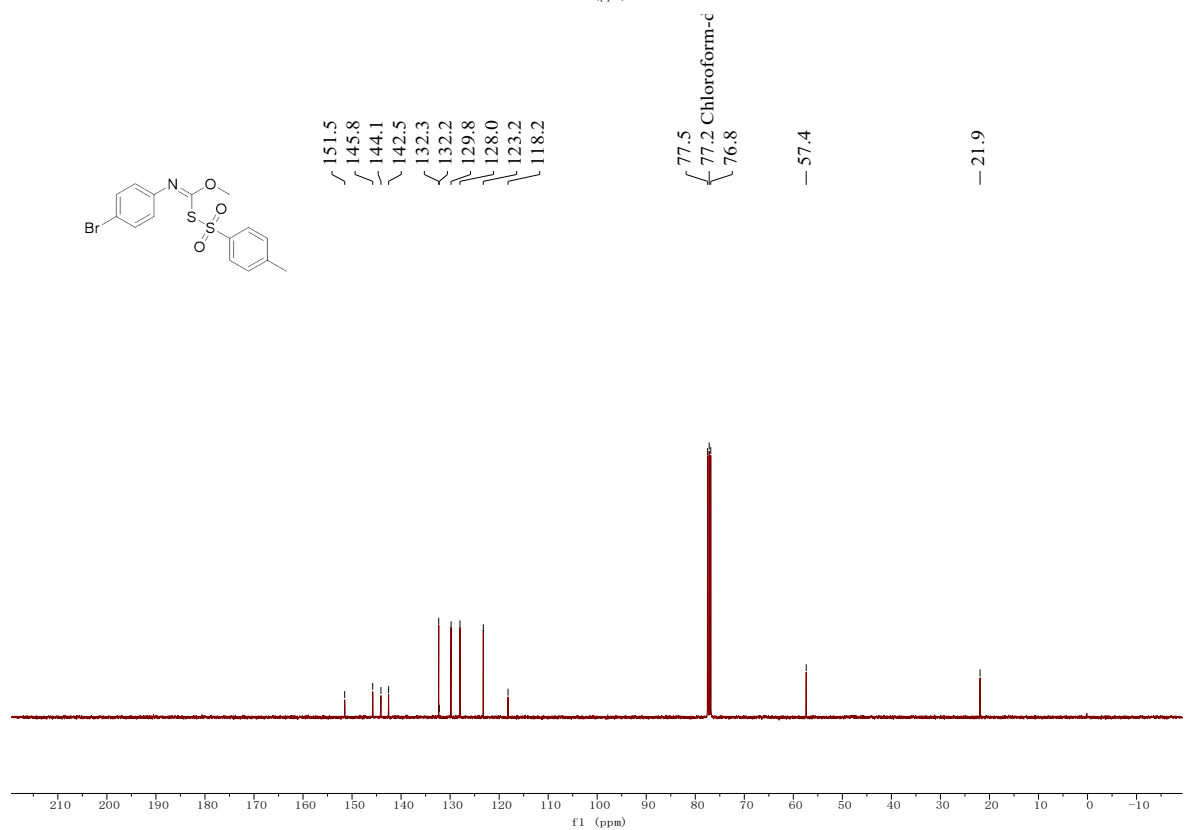

<sup>1</sup>H and <sup>13</sup>C NMR Spectrum of **4k** (500 MHz, Chloroform-*d*).

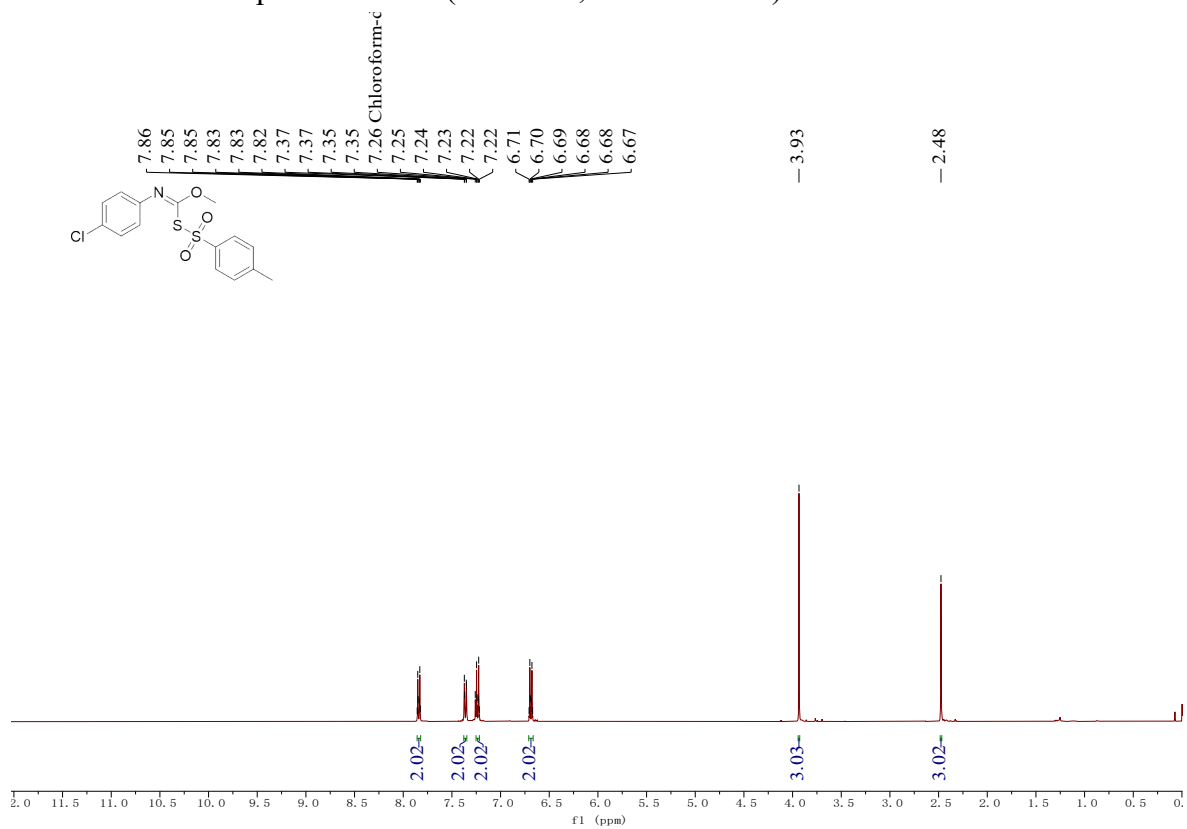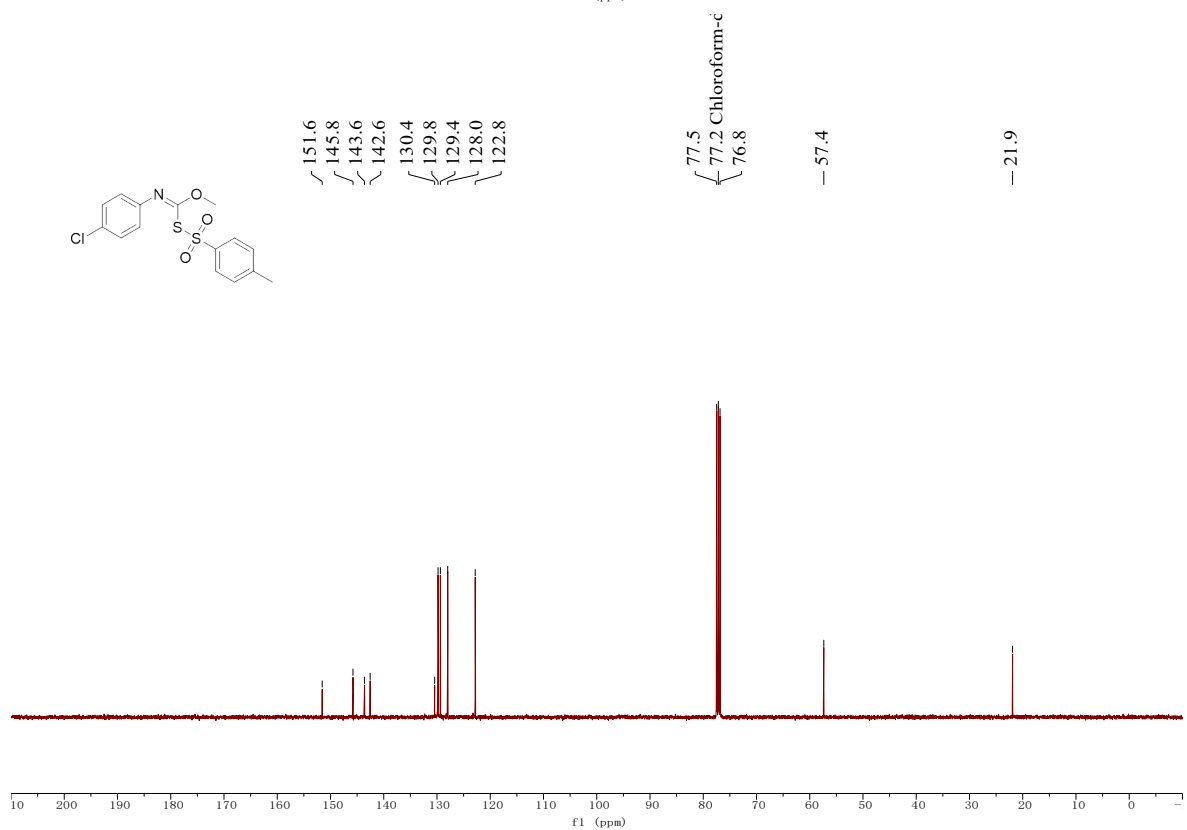

$^1\text{H}$ ,  $^{13}\text{C}$  and  $^{19}\text{F}$  NMR Spectrum of **41** (500 MHz, Chloroform-*d*).

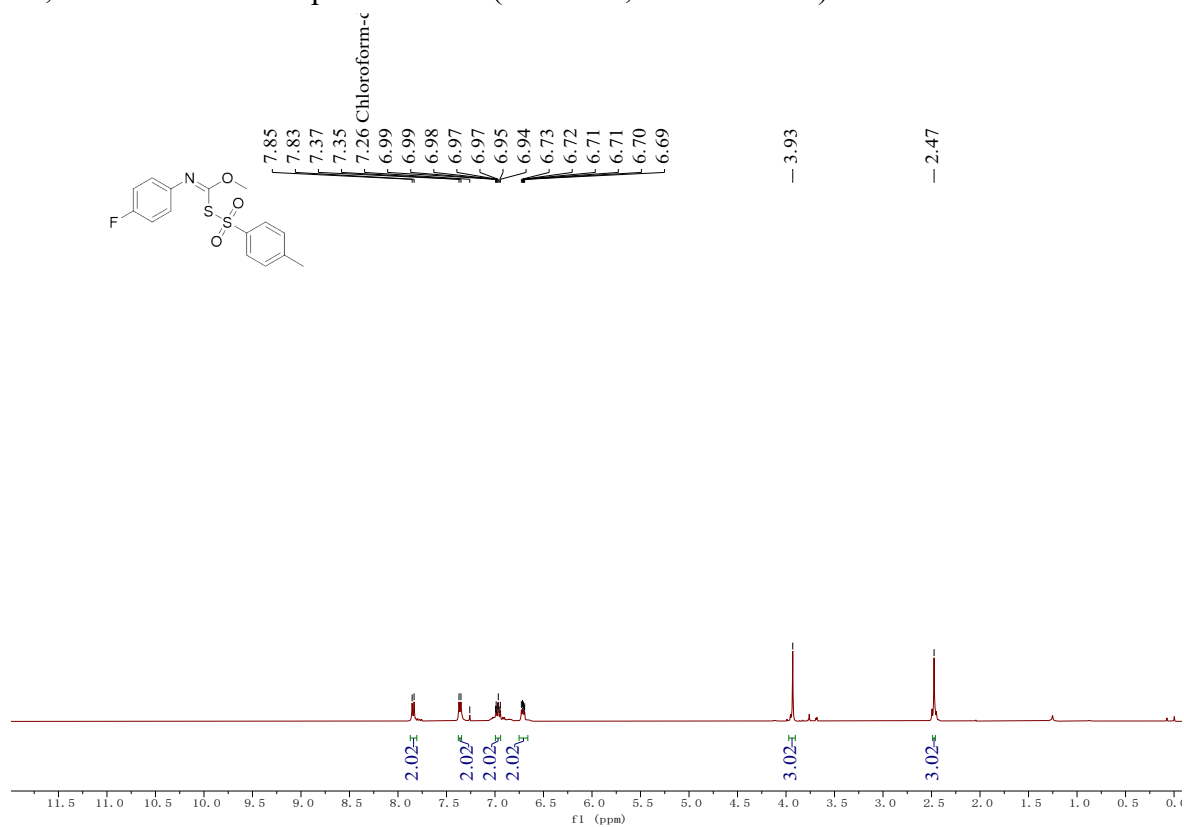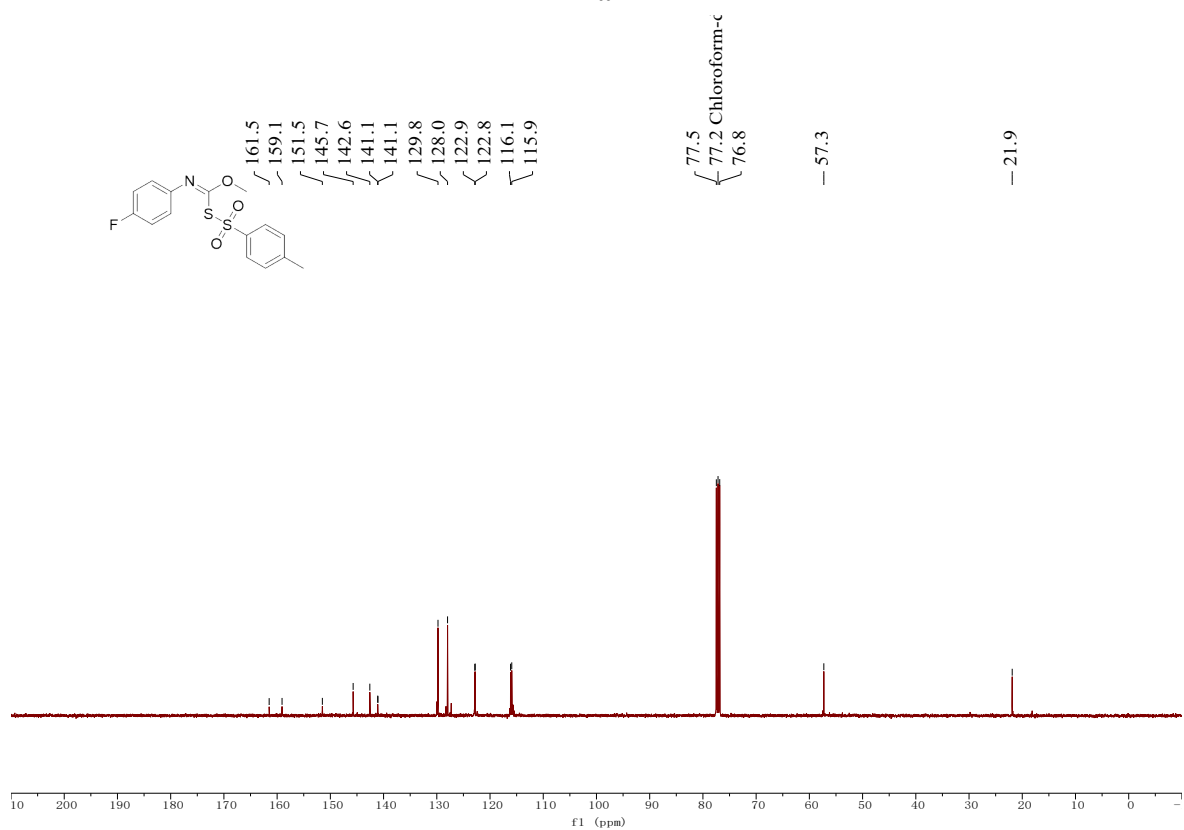

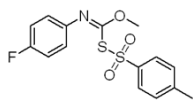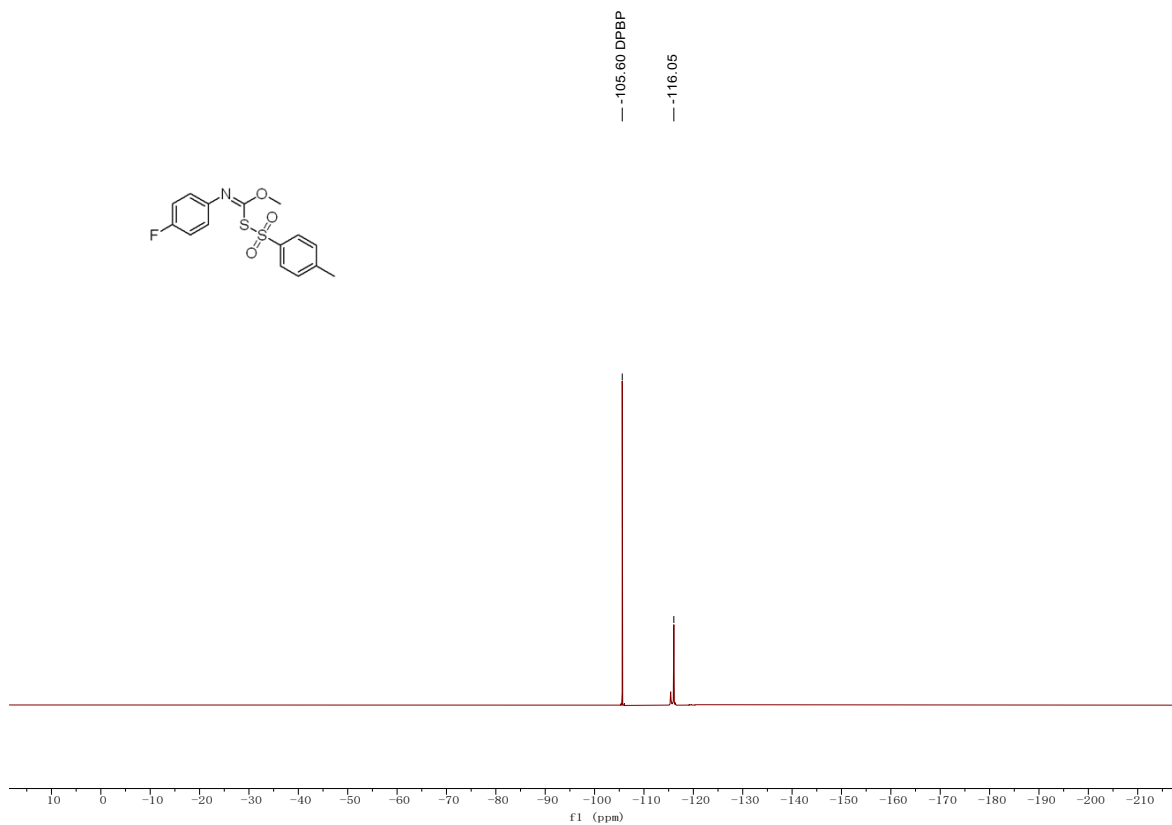

$^1\text{H}$ ,  $^{13}\text{C}$  and  $^{19}\text{F}$  NMR Spectrum of **4m** (500 MHz, Chloroform-*d*).

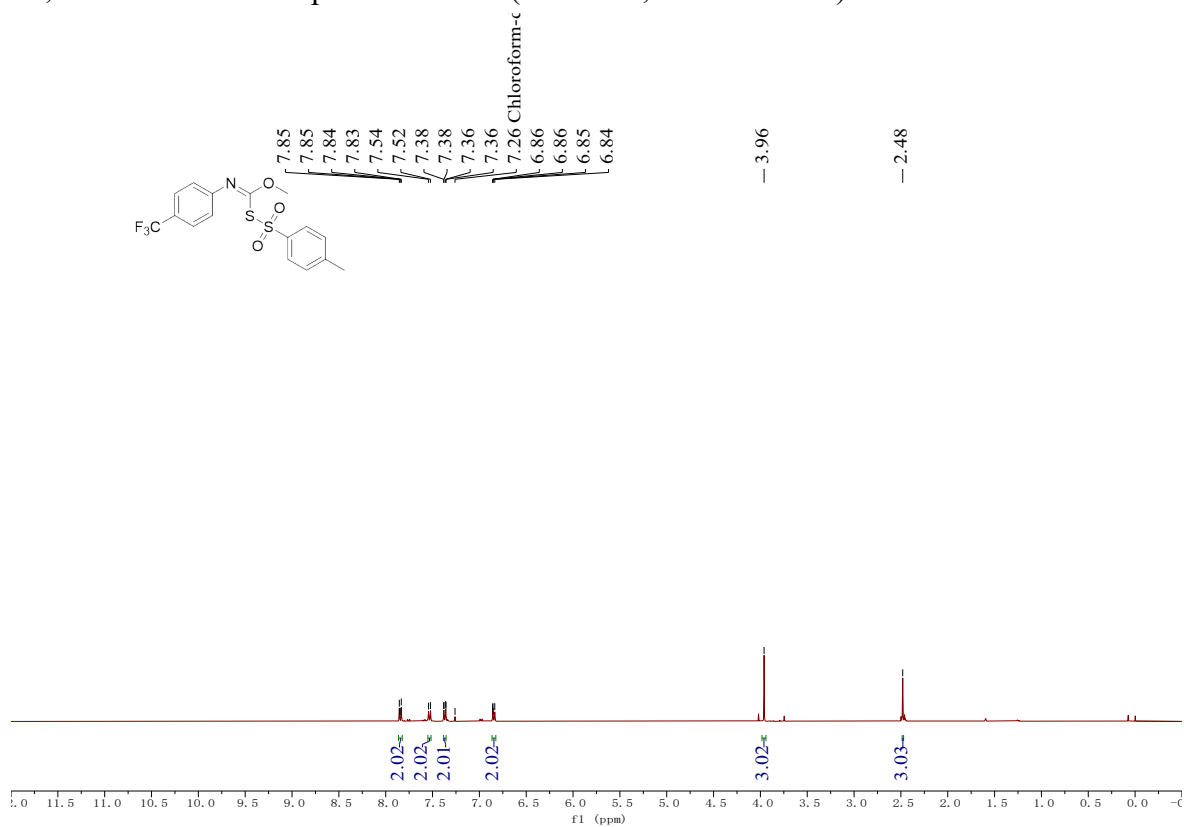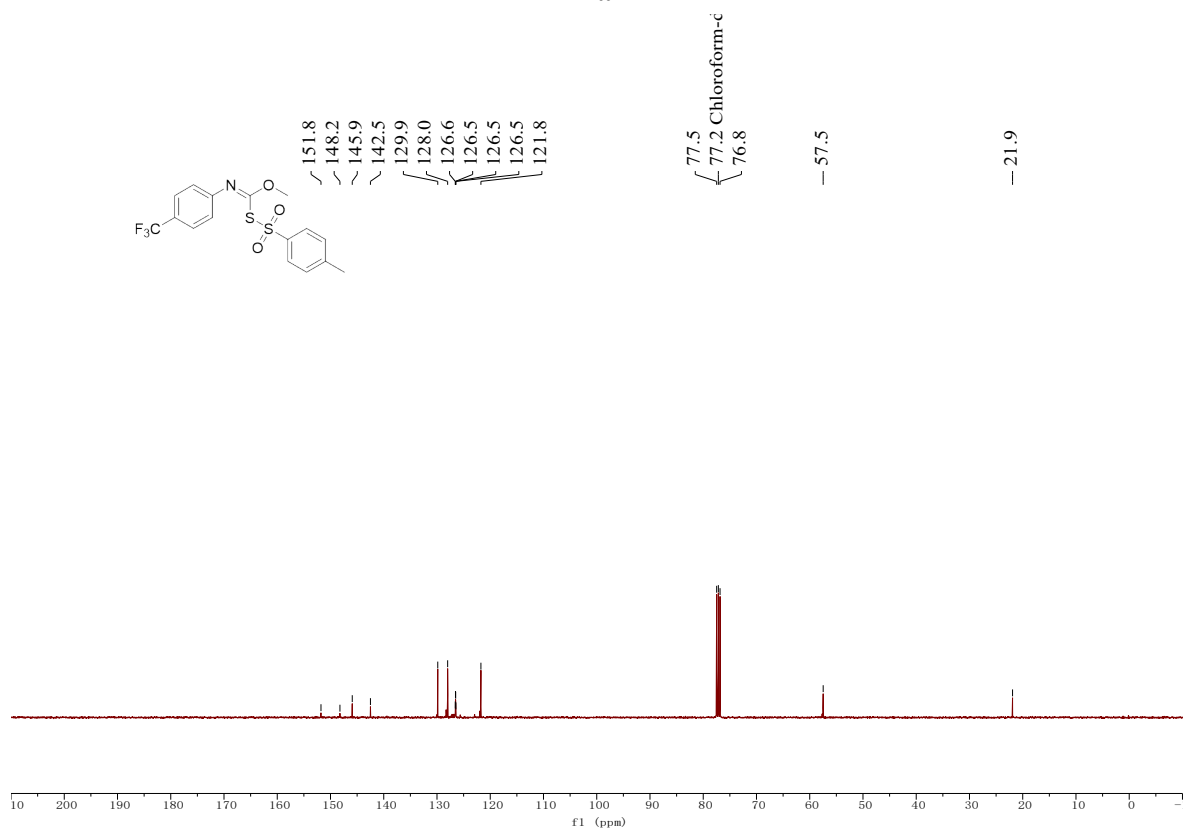

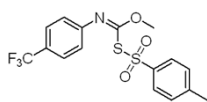

--- -61.90

--- -105.60 DPEP

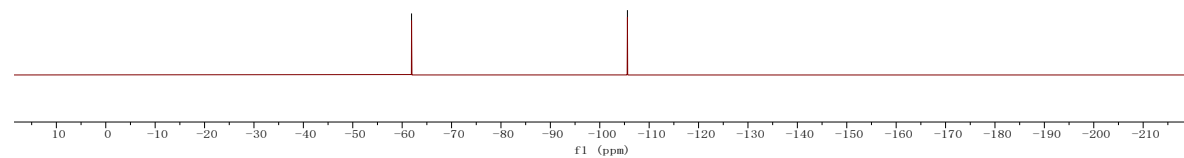

$^1\text{H}$  and  $^{13}\text{C}$  NMR Spectrum of **4n** (400 MHz, Chloroform-*d*).

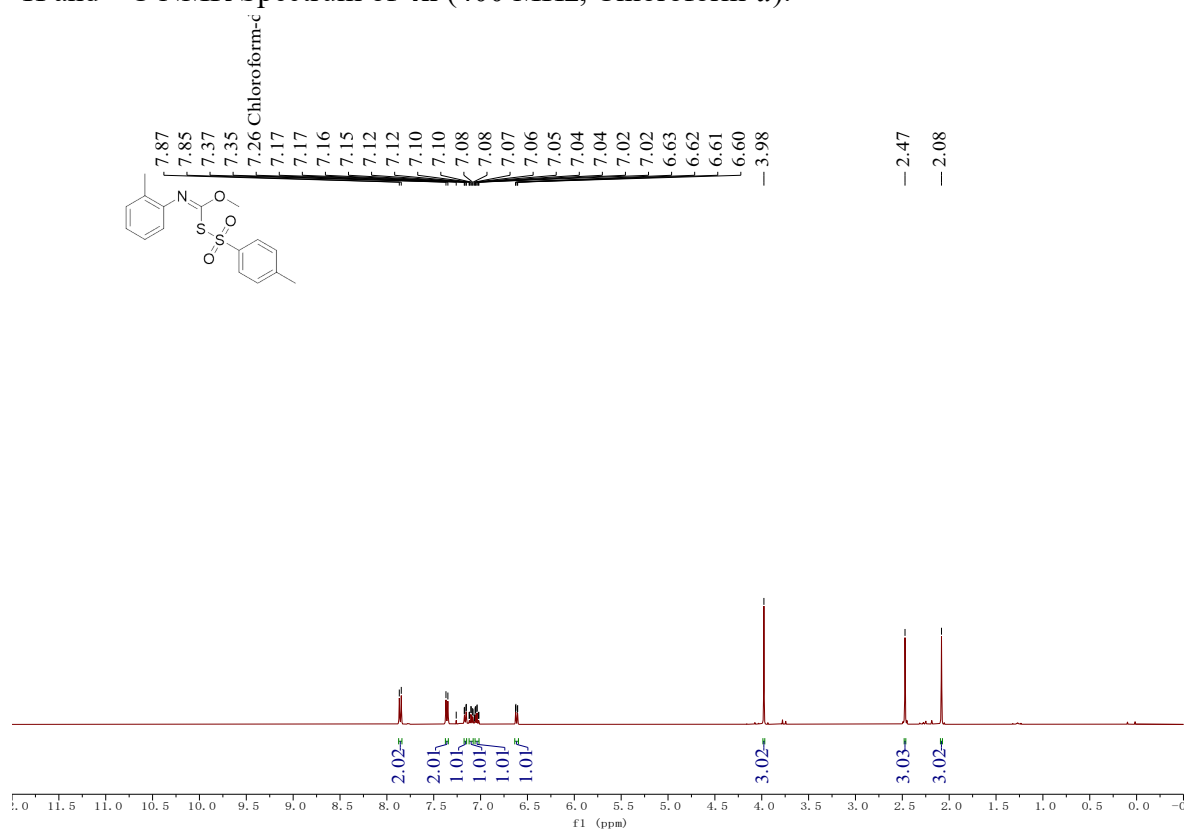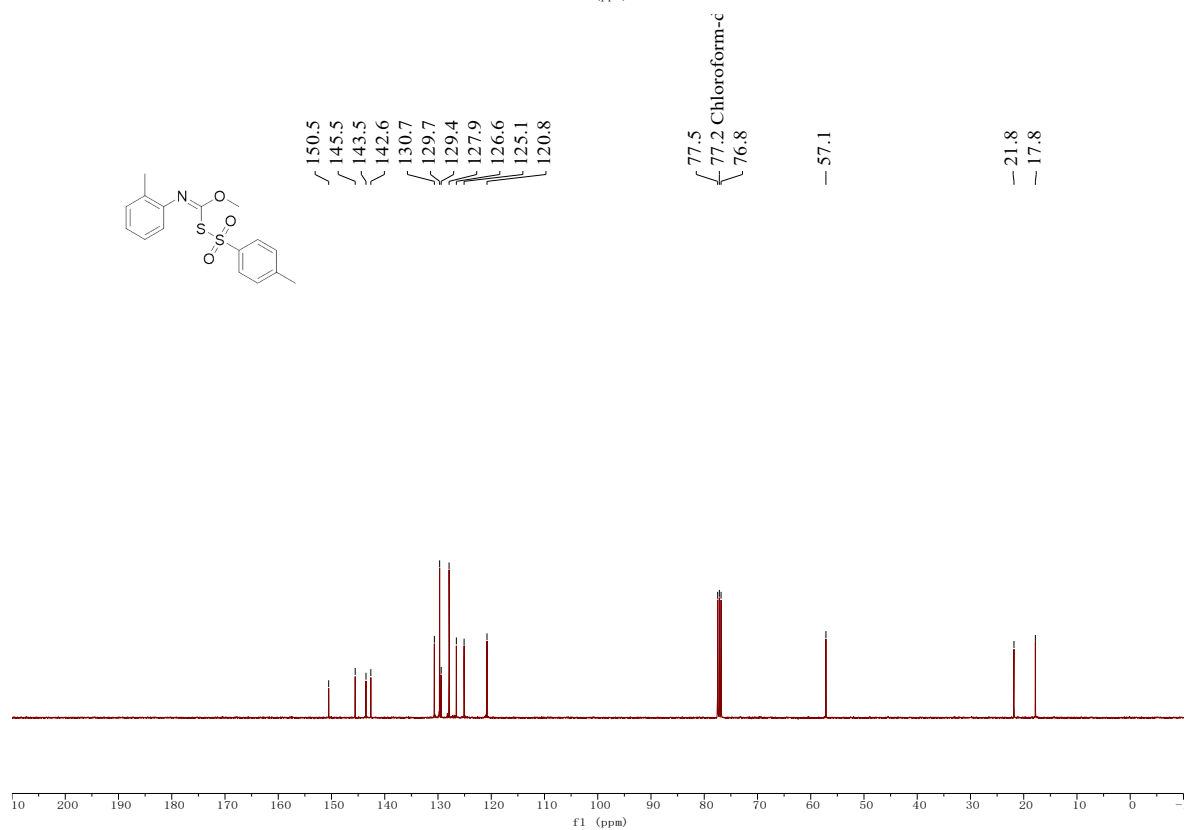



<sup>1</sup>H and <sup>13</sup>C NMR Spectrum of **4o** (400 MHz, Chloroform-*d*).

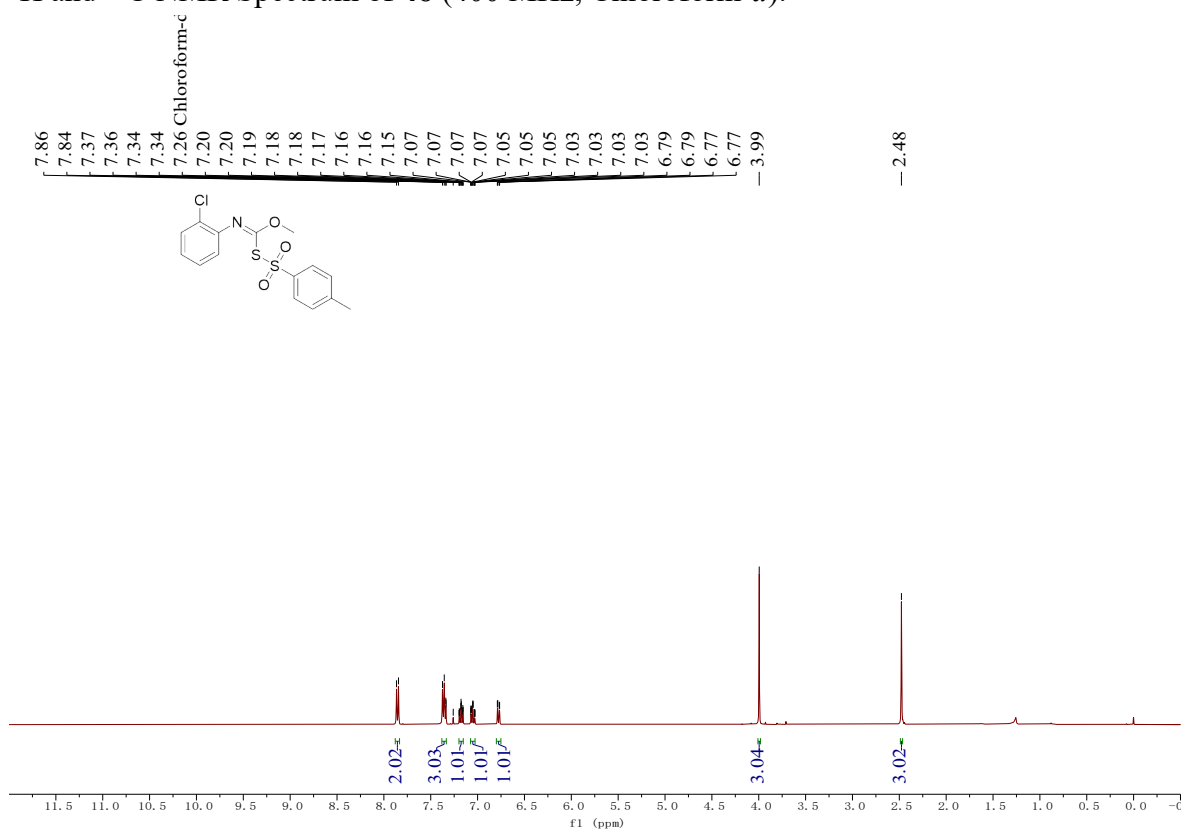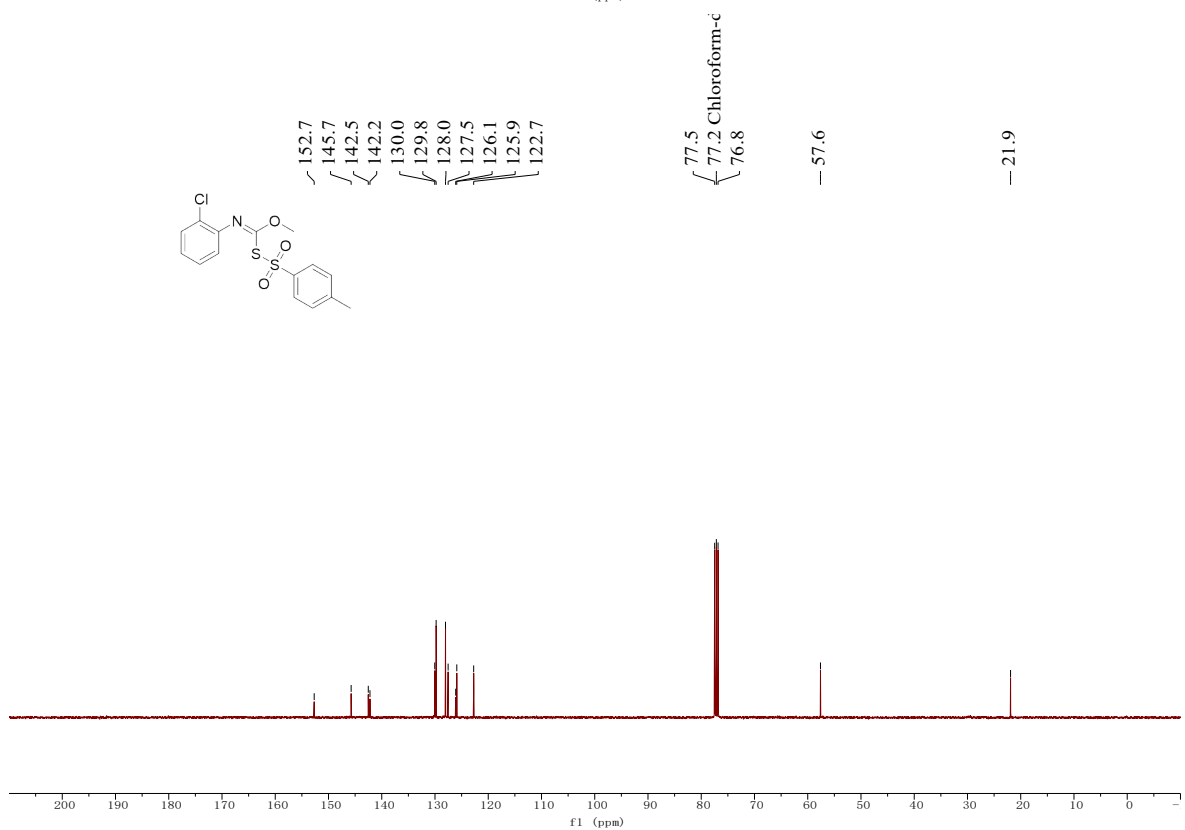

<sup>1</sup>H and <sup>13</sup>C NMR Spectrum of **4p** (400 MHz, Chloroform-*d*).

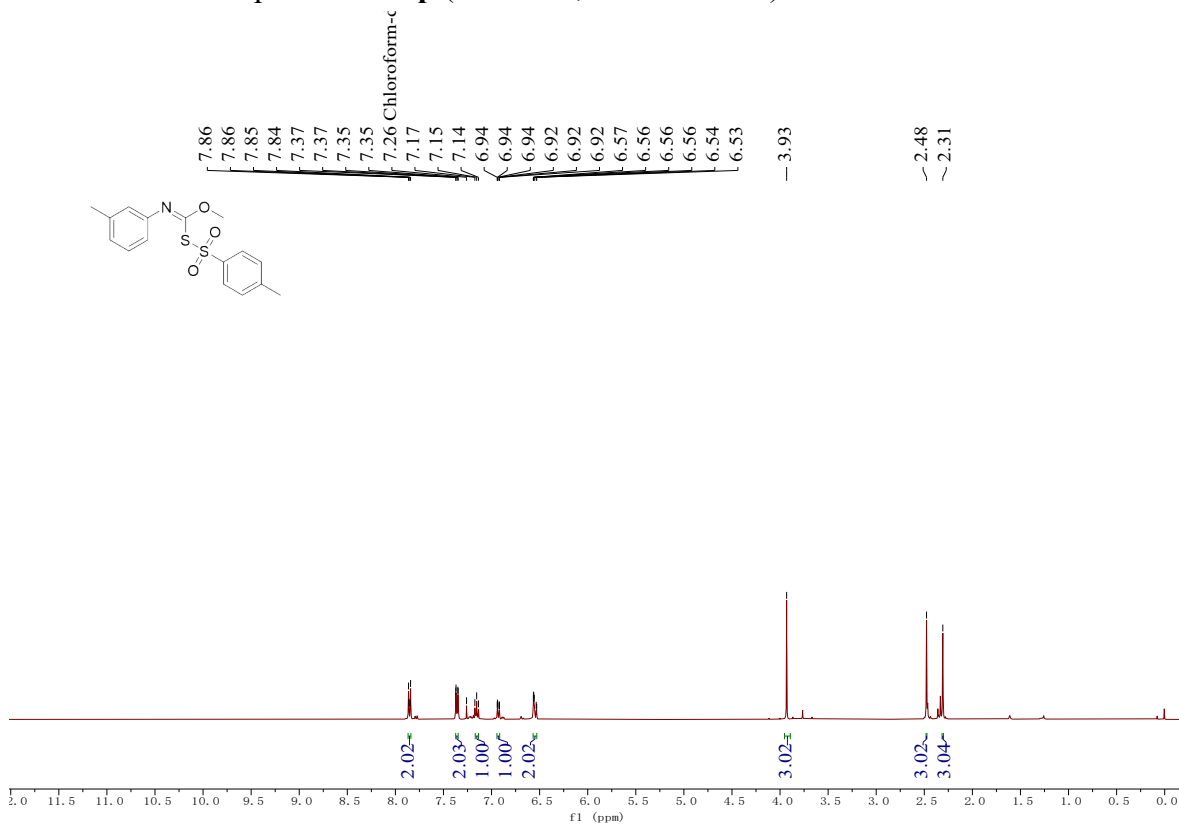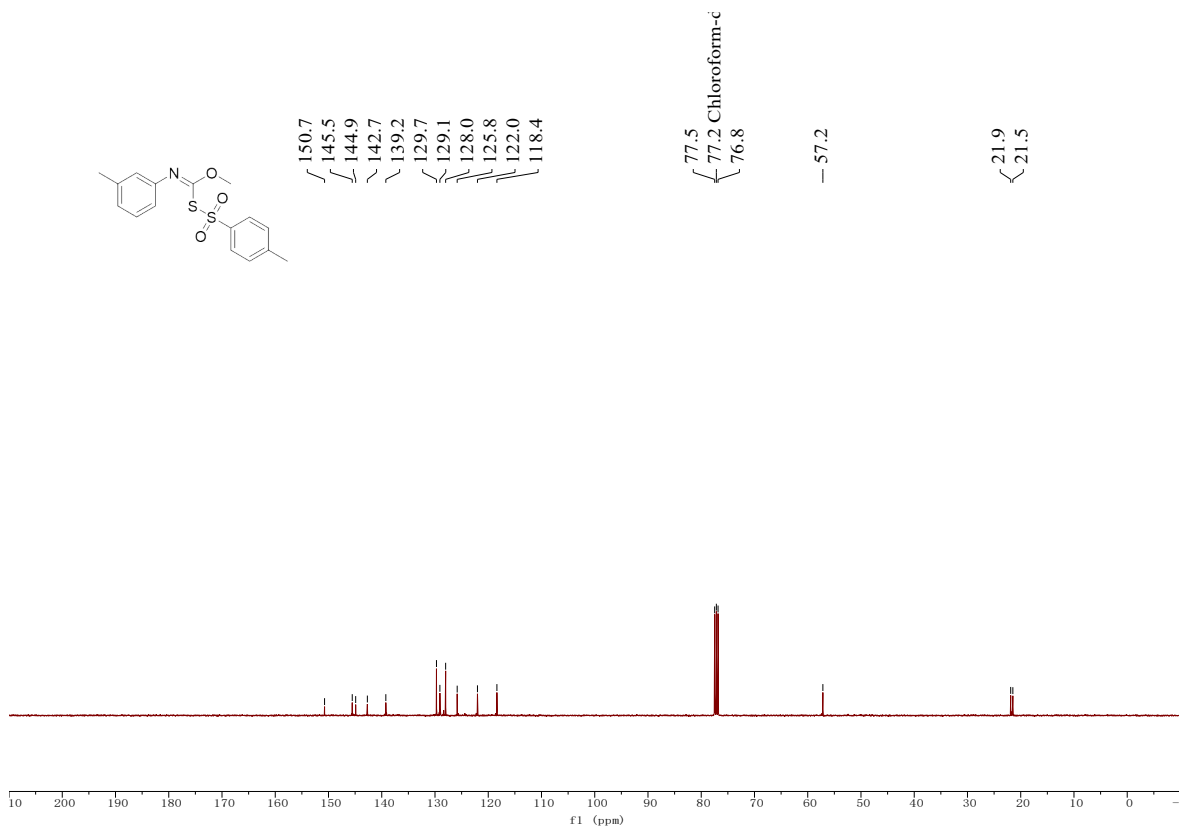

<sup>1</sup>H and <sup>13</sup>C NMR Spectrum of **4q** (400 MHz, Chloroform-*d*).

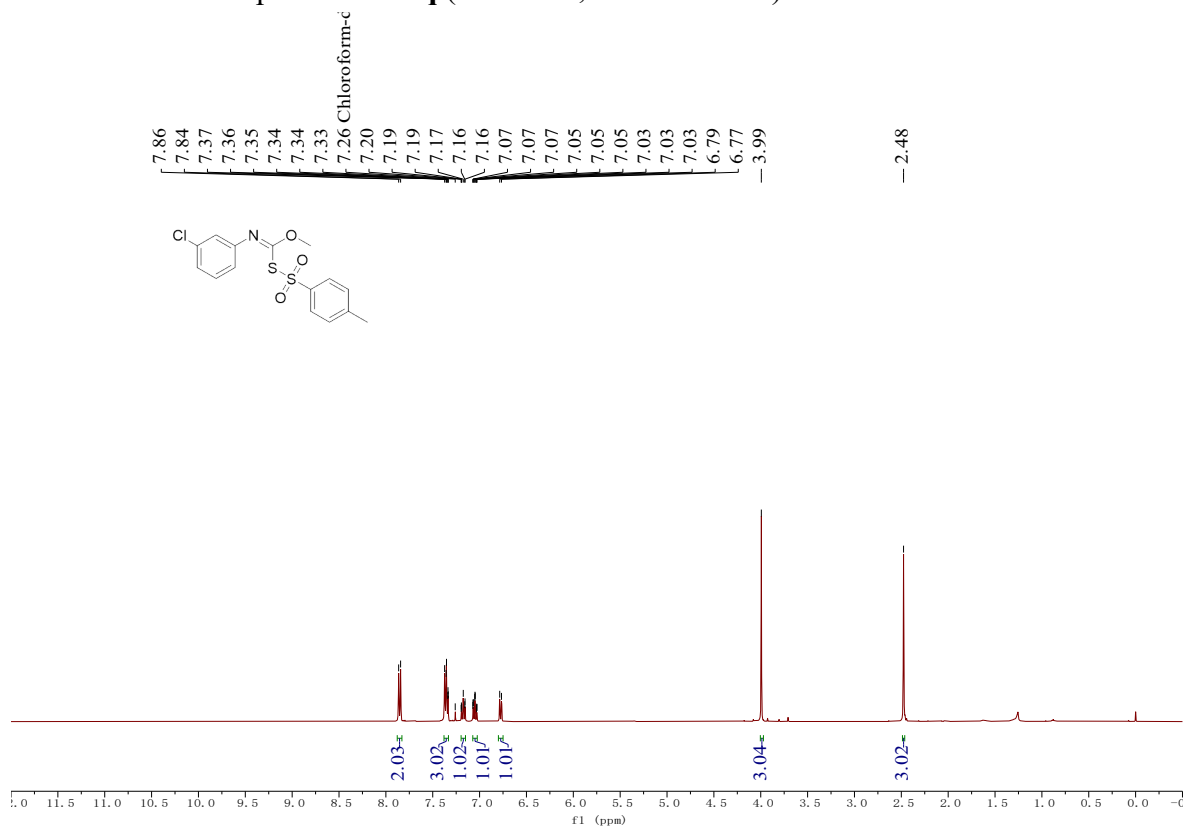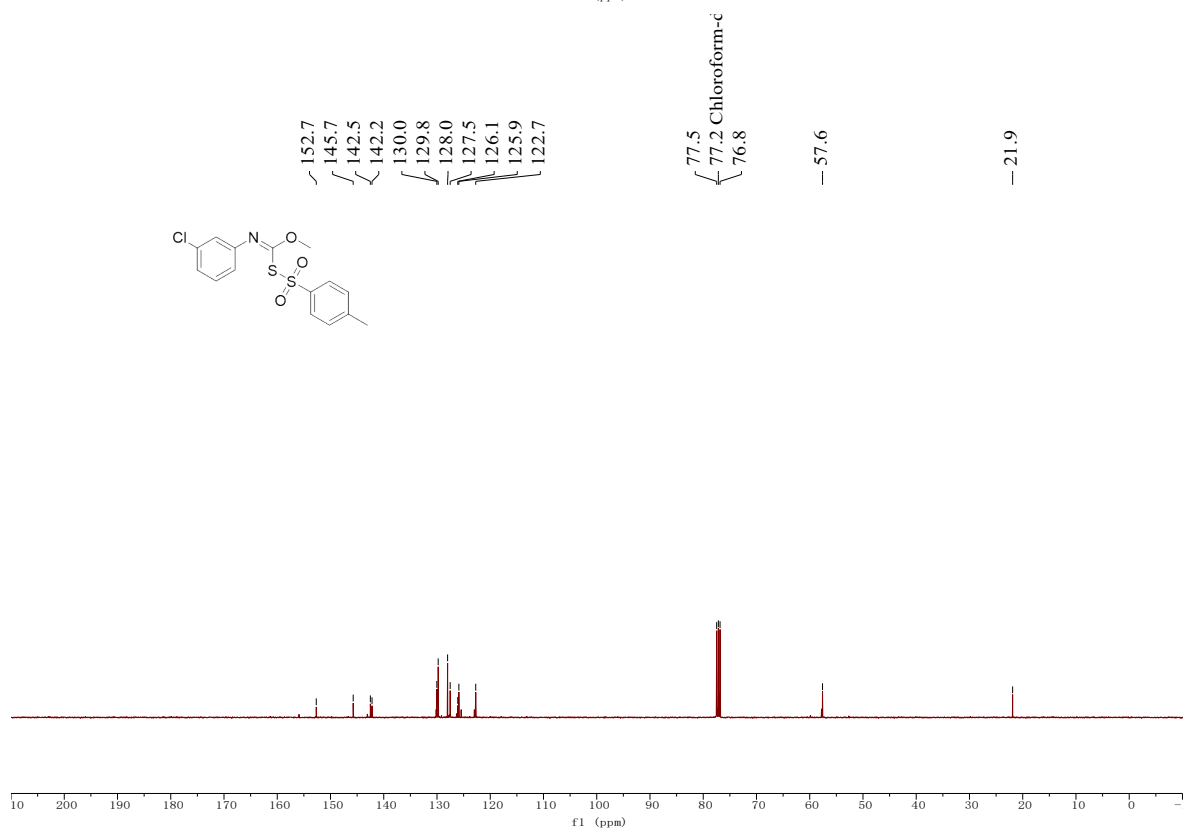

<sup>1</sup>H and <sup>13</sup>C NMR Spectrum of **4r** (400 MHz, Chloroform-*d*).

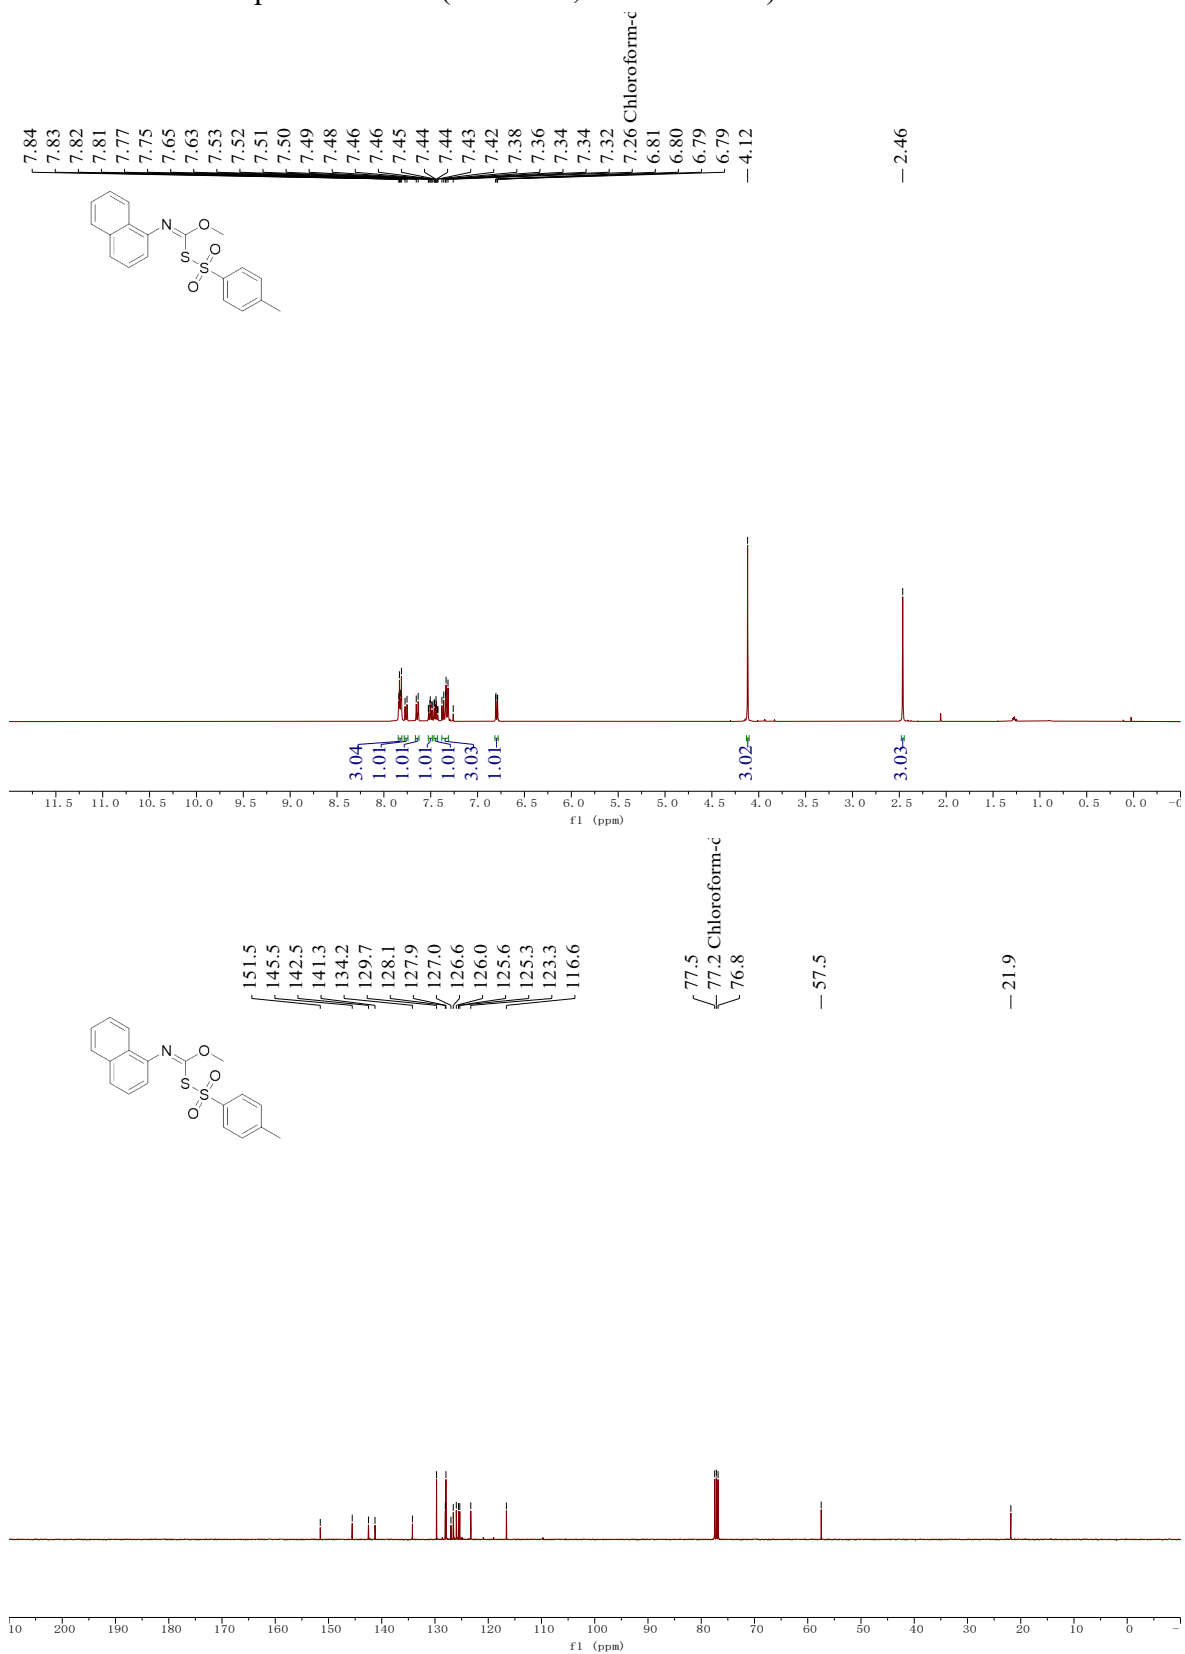

<sup>1</sup>H and <sup>13</sup>C NMR Spectrum of **4s** (400 MHz, Chloroform-*d*).

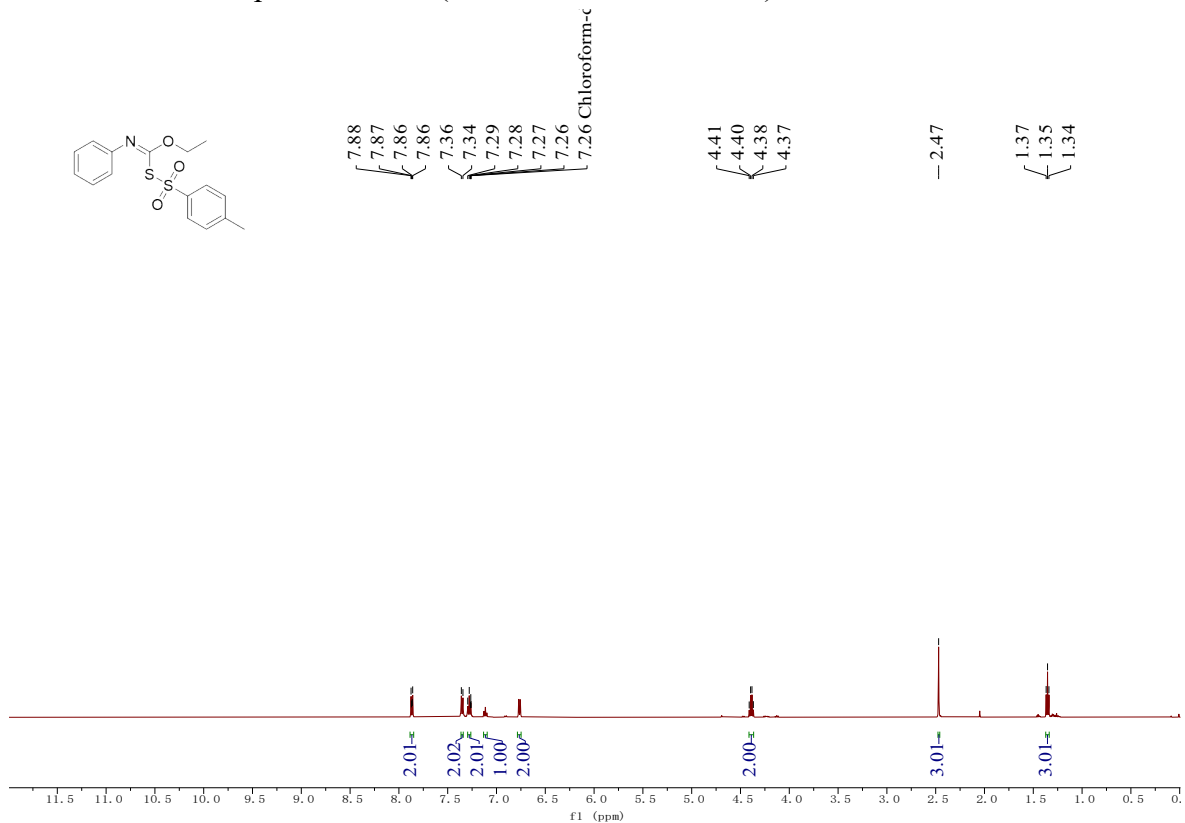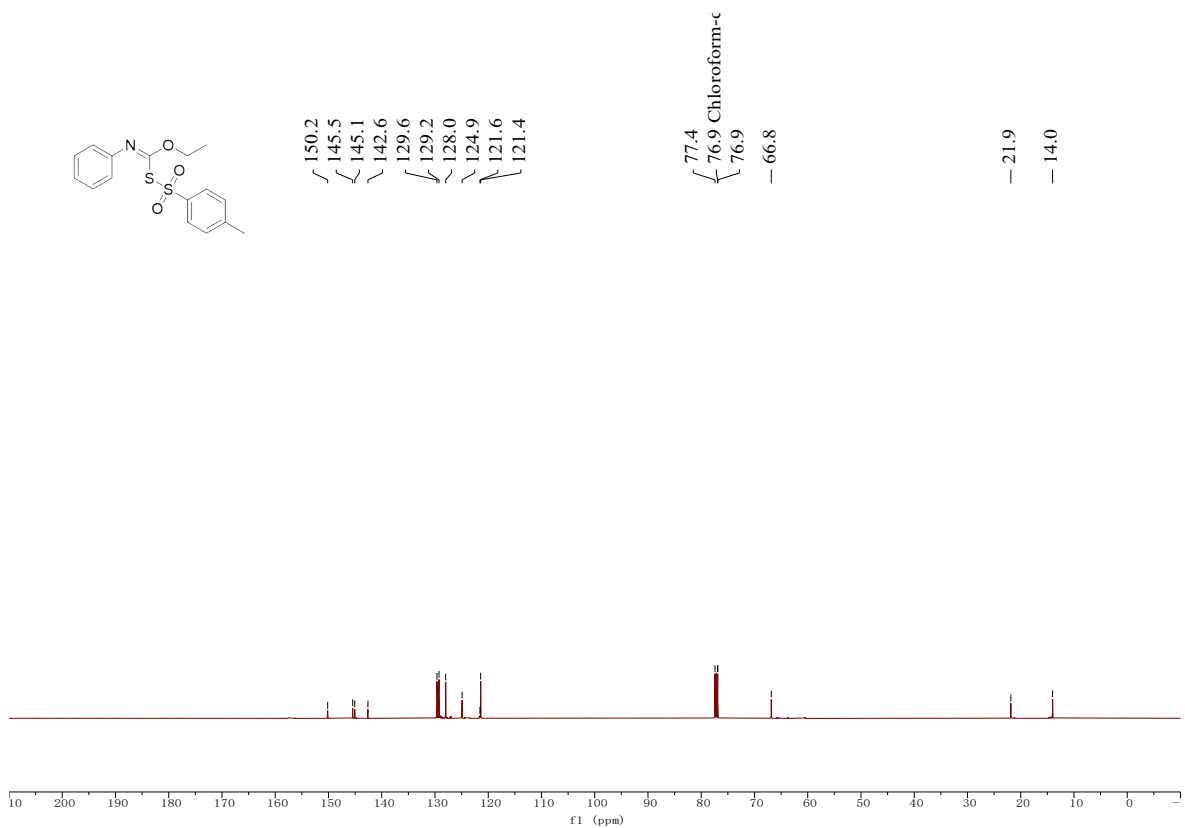

<sup>1</sup>H and <sup>13</sup>C NMR Spectrum of **4t** (400 MHz, Chloroform-*d*).

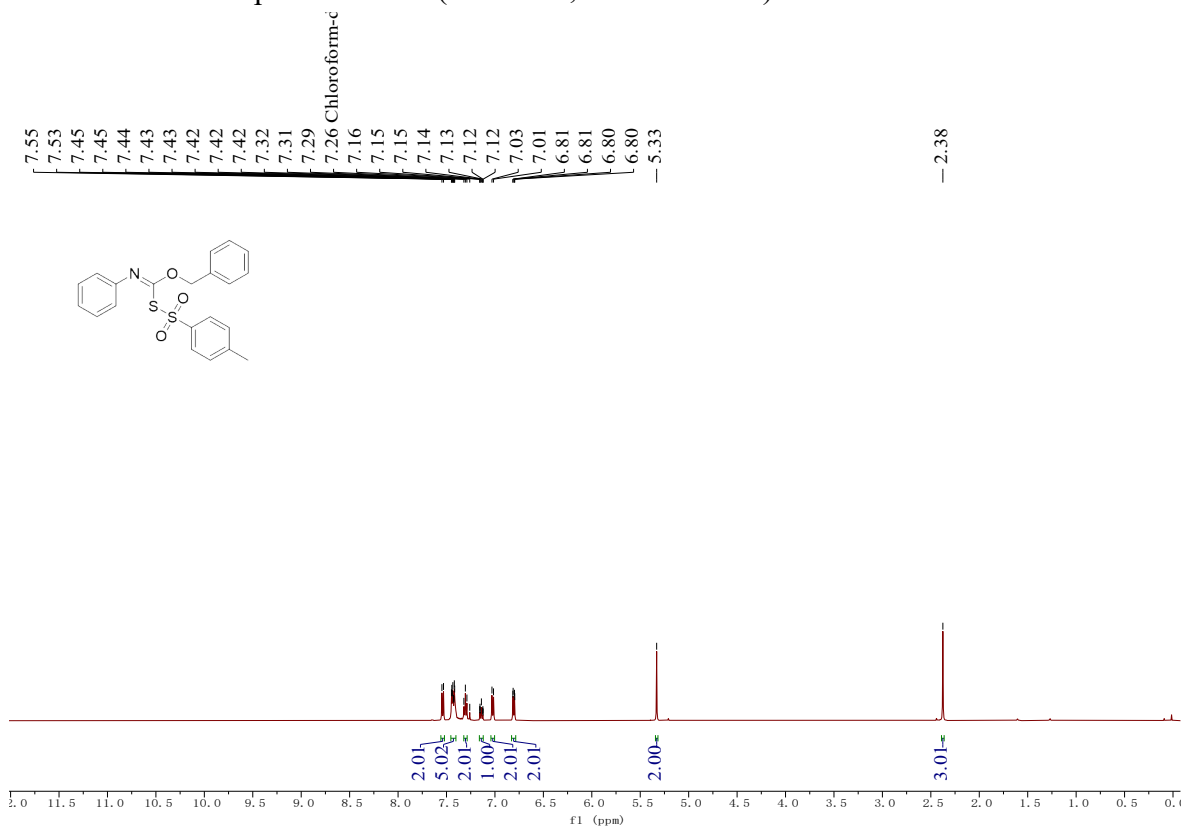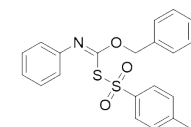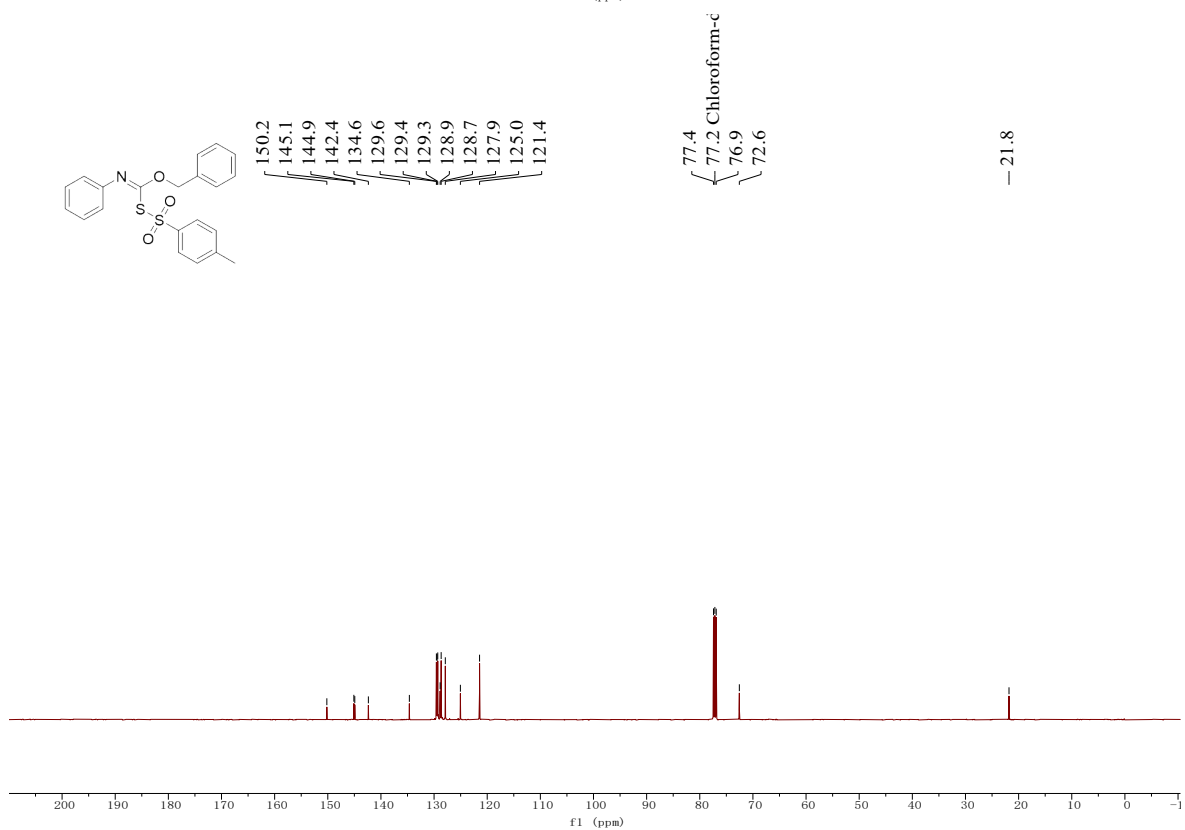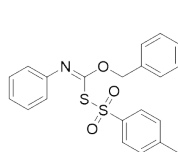

$^1\text{H}$  and  $^{13}\text{C}$  NMR Spectrum of **4u** (400 MHz, Chloroform-*d*).

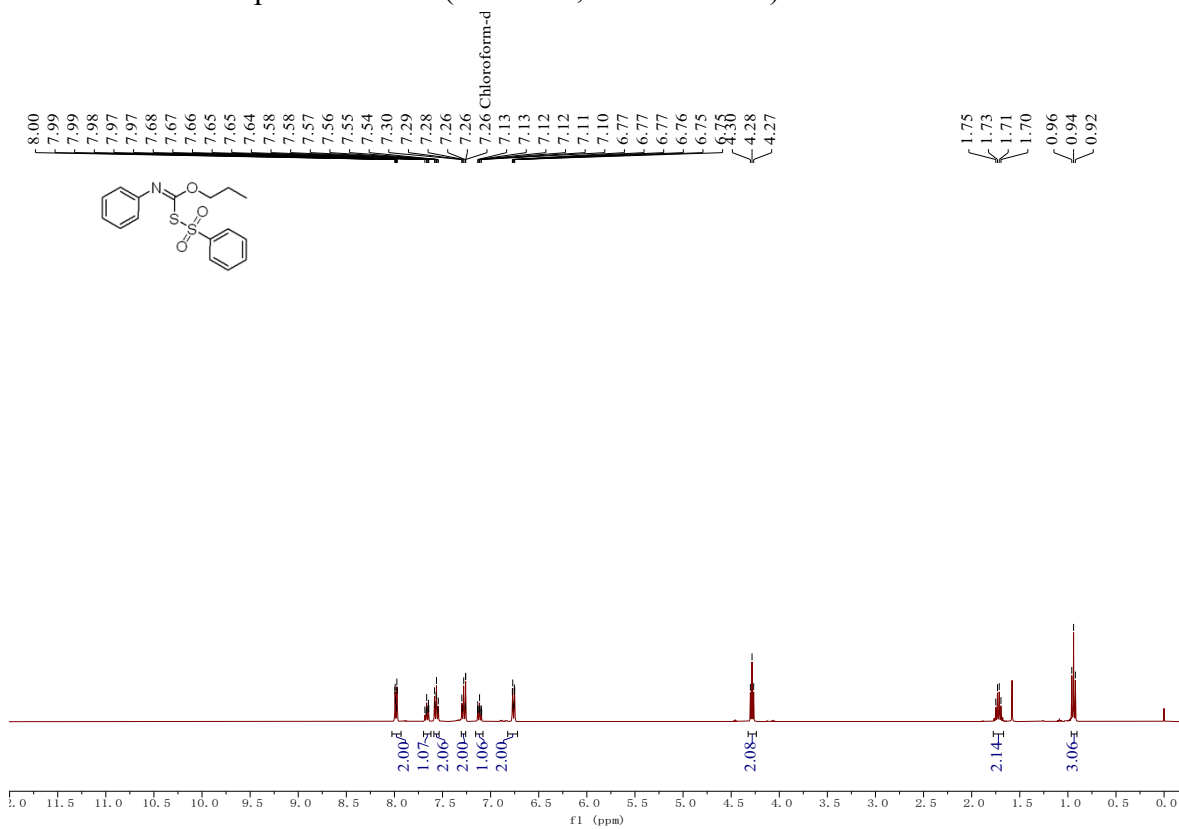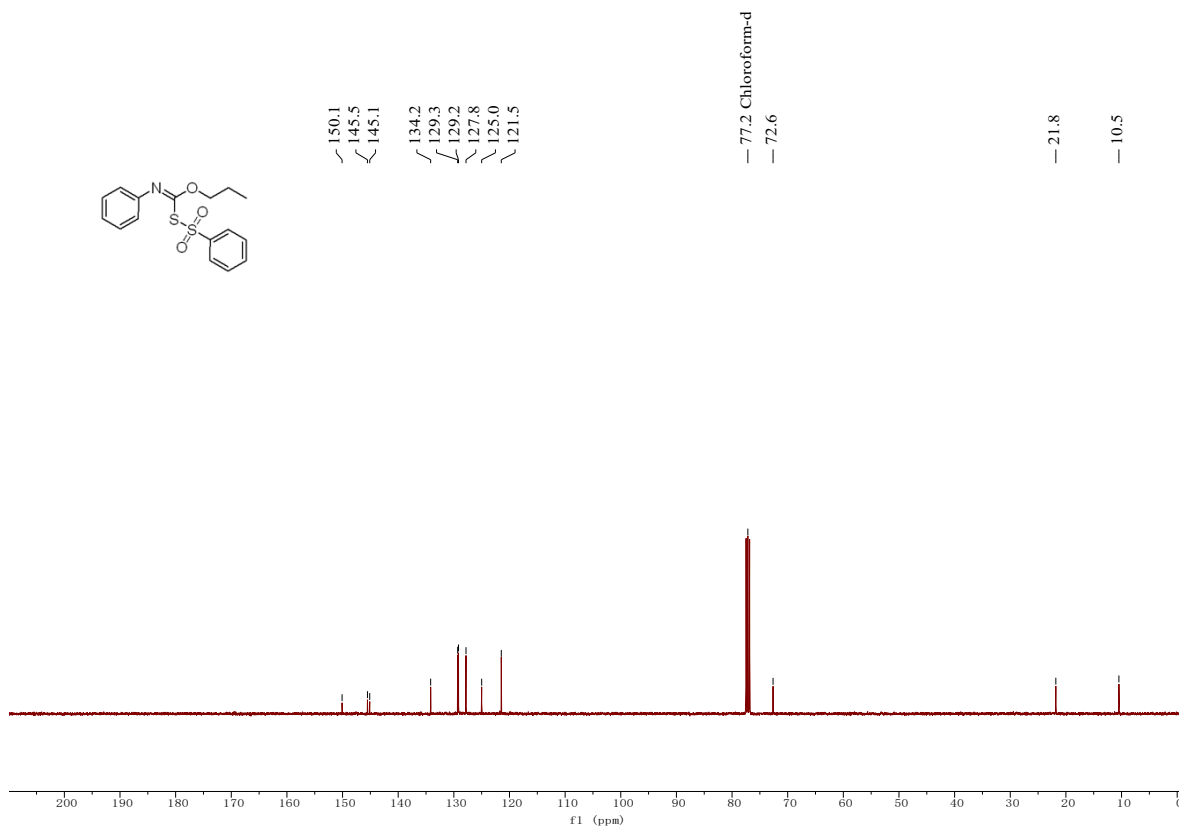

$^1\text{H}$  and  $^{13}\text{C}$  NMR Spectrum of **4v** (400 MHz, Chloroform-*d*).

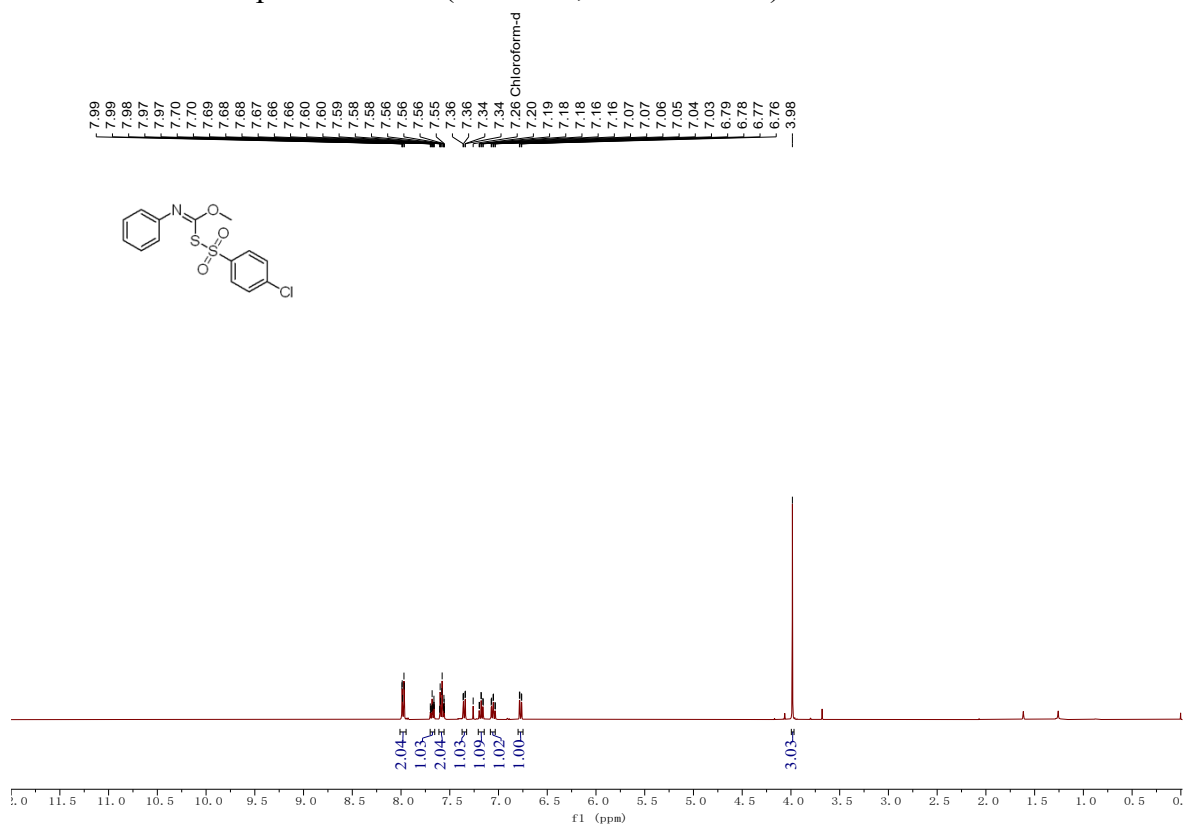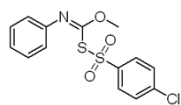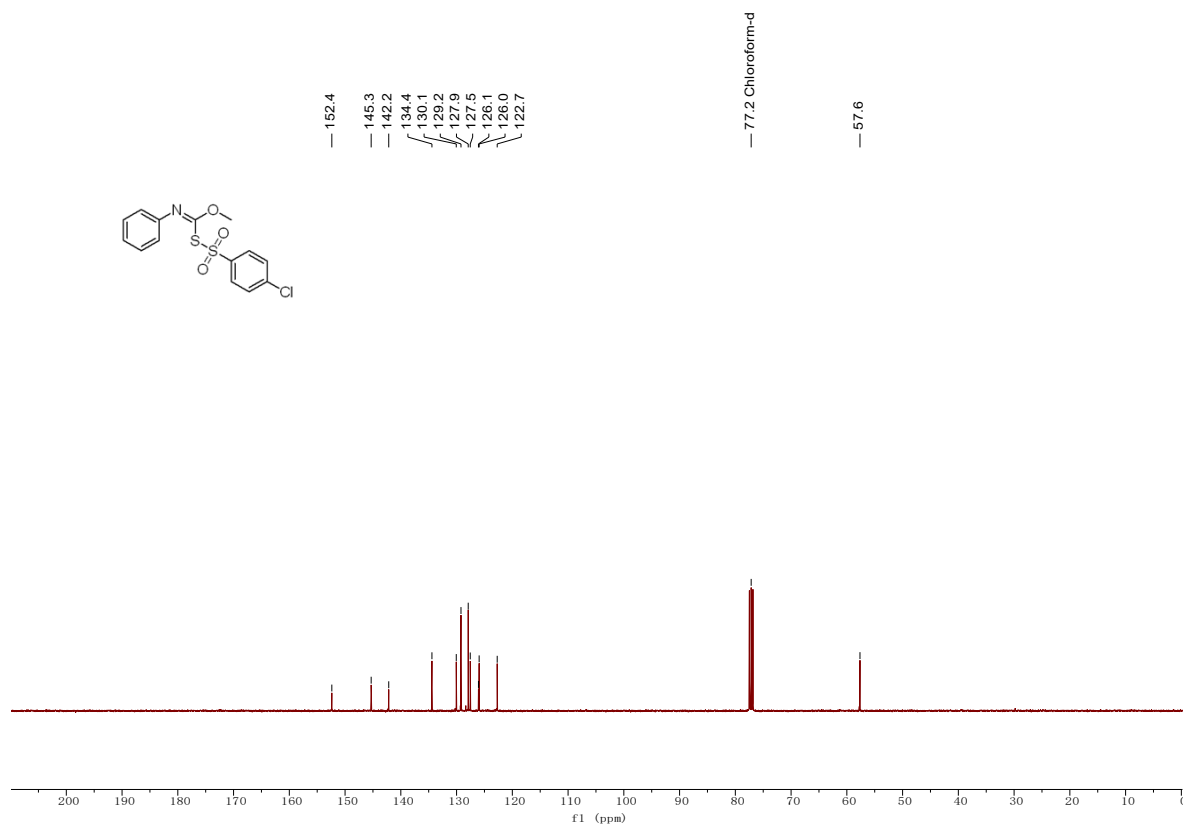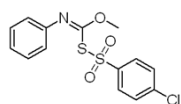



$^1\text{H}$  and  $^{13}\text{C}$  NMR Spectrum of **4w** (400 MHz, Chloroform-*d*).

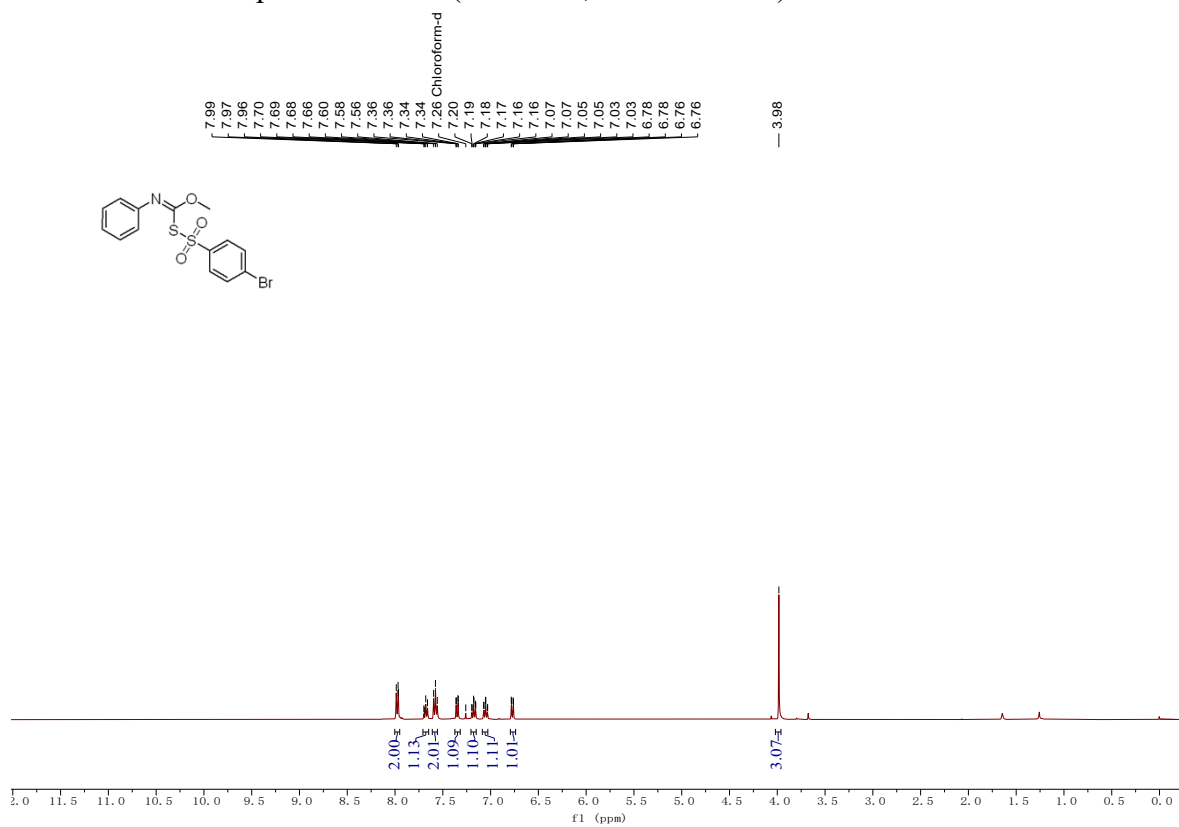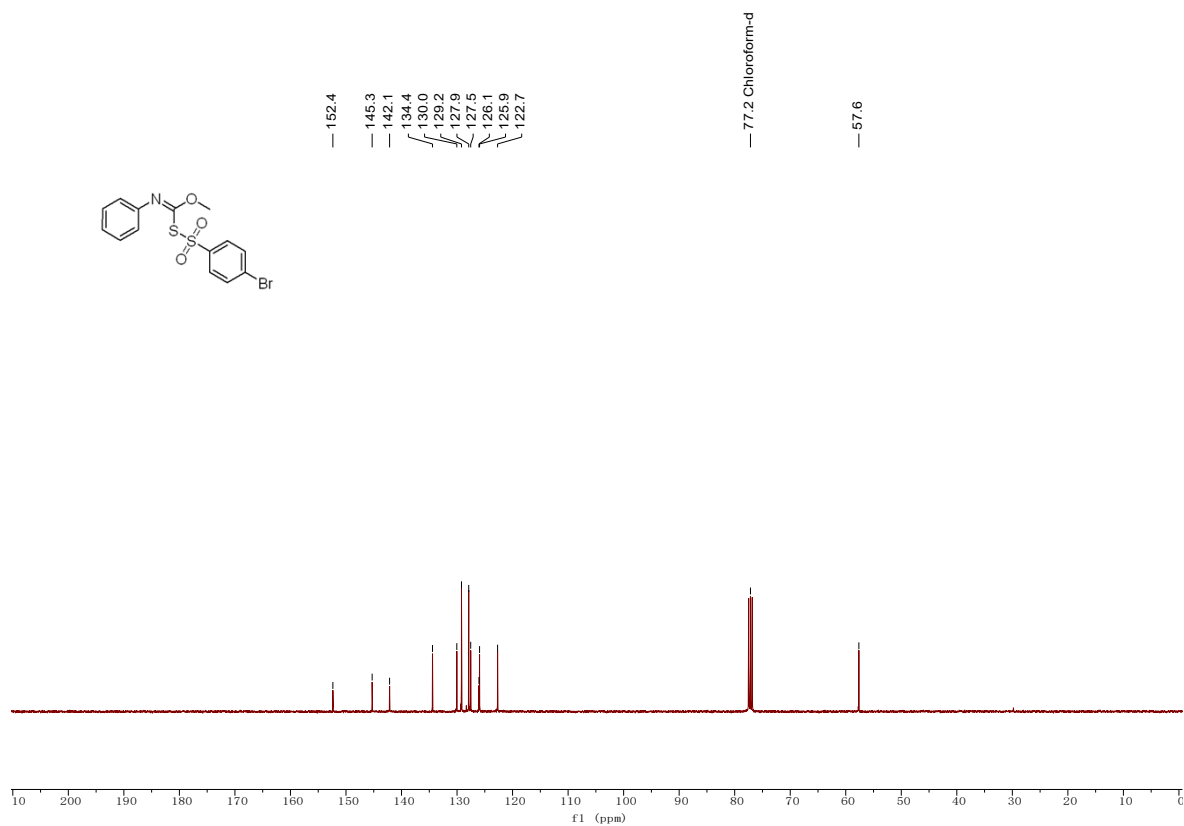

Supplement: d4cc03570d1.pdf [file d4cc03570d1.pdf]
